# Supplementary material
Source: PubMed Central journal article supplement (PMC6258315)
Supplement: NIHMS996458-supplement-esi.pdf [file NIHMS996458-supplement-esi.pdf]

# Isolation and Characterization of a High-Spin Mixed-Valent Iron Dinitrogen Complex

Sean F. McWilliams, Philip C. Bunting, Venkatesan Kathiresan, Brandon Q. Mercado, Brian M. Hoffman, Jeffrey R. Long and Patrick L. Holland\*

## Table of Contents

|                                         |     |
|-----------------------------------------|-----|
| <b>Experimental</b>                     | S2  |
| General                                 | S2  |
| Synthesis and characterization data     | S4  |
| Mössbauer Spectra                       | S5  |
| NMR Spectra                             | S8  |
| IR Spectra                              | S10 |
| UV-visible Spectra                      | S12 |
| <b>Susceptibility &amp; EPR Studies</b> | S14 |
| <b>Crystallography</b>                  | S28 |
| <b>References</b>                       | S47 |

## Experimental

### General

All manipulations were performed under a nitrogen atmosphere (or argon atmosphere where specified) by Schlenk techniques or in an M. Braun glovebox maintained at or below 1 ppm of O<sub>2</sub>. Glassware was oven-dried at 150 °C for at least 12 h before use. Graphite, Celite, and 4 Å molecular sieves were dried at 200 °C under vacuum for at least 12 h. Pentane, hexane, and diethyl ether were purified by passage through activated alumina and Q5 columns from Glass Contour Co, under Ar. THF was distilled under Ar from a potassium benzophenone ketyl solution. All solvents were stored over 4 Å molecular sieves and passed through a plug of activated alumina immediately prior to use. Benzene-*d*<sub>6</sub> was dried over activated alumina and stored over 4 Å molecular sieves. THF-*d*<sub>8</sub> was vacuum transferred from sodium benzophenone ketyl solutions and was stored over 4 Å molecular sieves. <sup>15</sup>N<sub>2</sub> (98%) was purchased from Cambridge Isotope Laboratories. Potassium was obtained from Sigma-Aldrich (98%). Potassium on graphite was prepared by heating stoichiometric amounts of potassium and graphite at 140 °C under an argon atmosphere.<sup>1</sup> 18-crown-6 (ACROS Organics) was dried over 4 Å molecular sieves as a solution in diethyl ether and then volatiles removed under vacuum prior to use. [L<sup>Me</sup>Fe(μ-N<sub>2</sub>)FeL<sup>Me</sup>] (**1**),<sup>2</sup> K<sub>2</sub>[L<sup>Me</sup>Fe(μ-N<sub>2</sub>)FeL<sup>Me</sup>] (**4**),<sup>2</sup> [L<sup>tBu</sup>Fe(μ-N<sub>2</sub>)FeL<sup>tBu</sup>],<sup>3</sup> and K<sub>2</sub>[L<sup>Me</sup>Fe(μ-N<sub>2</sub>)FeL<sup>Me</sup>]<sup>3</sup> were prepared according to the previously reported procedure. NMR data were collected on an Agilent 400 or 500 MHz spectrometer. Chemical shifts in <sup>1</sup>H NMR spectra are referenced to external SiMe<sub>4</sub> using the residual protiated solvent peaks as internal standards: C<sub>6</sub>D<sub>5</sub>H (δ 7.16 ppm), C<sub>6</sub>D<sub>11</sub>H (δ 1.38 ppm), and THF-*d*<sub>8</sub> (δ 3.58 ppm). Solution magnetic susceptibilities were determined by the Evans method.<sup>4</sup> Elemental analyses were performed at the CENTC Elemental Analysis Facility at the University of Rochester. IR spectra were collected on an Alpha Platinum ATR IR Spectrometer. UV-vis spectra were recorded on a Cary 50 spectrometer using Schlenk-adapted quartz cuvettes with a 1, 2, or 10 mm path length with a Unisoku CoolSpek UV USP-203A cryostat.

**<sup>57</sup>Fe Mössbauer Spectroscopy.** Solid & frozen solution Mössbauer samples were packed in Delrin sample cups and loaded into the spectrometer at 77 K. Mössbauer measurements were performed using a SEE Co. MS4 Mössbauer spectrometer integrated with a Janis SVT-400T He/N<sub>2</sub> cryostat for measurements at 80 K with a 0.07 T applied magnetic field. Isomer shifts were determined relative to  $\alpha$ -iron at 298 K. All Mössbauer spectra were fit using the program WMoss (SEE Co.), using Lorentzian doublets.

**SQUID Magnetometry.** All magnetic measurements were carried out in a Quantum Design MPMS-XL SQUID Magnetometer. Polycrystalline samples were loaded into quartz tubes with an equal amount of eicosane in a glovebox. A sealable hose adapter was attached to the tubes so they could be sealed under vacuum. The eicosane was melted around the sample to restrain the crystallites. Samples were measured from 1.7 to 300 K at DC fields ranging from 0 to 7 T. AC magnetic susceptibility from the MPMS was collected using a 4 Oe probe field. All data were corrected for diamagnetic contributions of the eicosane and the sample itself using Pascal's constants.

The ac susceptometry data were fit using a generalized Debye model that accounts for relaxation time ( $\tau$ ), isothermal susceptibility ( $\chi_T$ ), adiabatic susceptibility ( $\chi_S$ ), and the presence of a distribution of relaxation times ( $\alpha$ ).<sup>5</sup>

Low-temperature reduced magnetization were fit using the freely available program, PHI,<sup>6</sup> and the zero-field splitting Hamiltonian:

$$H_{ZFS} = D \left[ S_z^2 - \frac{1}{3} S(S+1) \right] + E [S_x^2 - S_y^2] + g_{\parallel} \mu_B H S_z + g_{\perp} \mu_B H S_x$$

## Synthesis and characterization:

**Synthesis of  $[\text{L}^{\text{Me}}\text{Fe}(\mu\text{-N}_2)\text{FeL}^{\text{Me}}][\text{K}(\text{18-crown-6})(\text{THF})_2]\text{THF}$  (**2**).**  $\text{L}^{\text{Me}}\text{Fe}(\mu\text{-N}_2)\text{FeL}^{\text{Me}}$  (97.7 mg, 0.100 mmol) and 18-crown-6 (32.1 mg, 0.122 mmol) were dissolved in THF (6 mL) yielding a dark purple solution. Potassium graphite ( $\text{KC}_8$ , 14.7 mg, 0.109 mmol) was added to the stirring purple solution resulting in a color change to dark green upon mixing. The reaction was allowed to stir for 1 h. Volatile materials were removed under vacuum and resulting dark solid was washed with diethyl ether (10 mL). The solid was extracted with THF (3 mL) and filtered through Celite to give a dark green solution. Pentane (10 mL) was added to the THF filtrate resulting in dark precipitate. The precipitate was collected on a fine frit and washed with diethyl ether (5 mL) and toluene (5 mL). The solid was dried under vacuum yielding dark green **2** (94.3 mg, 63%). Single crystals of **2** for X-ray diffraction (XRD) were obtained using a THF/pentane vapor diffusion at  $-40\text{ }^\circ\text{C}$  for 2 d.  $^1\text{H}$  NMR (400 MHz,  $\text{THF-}d_8$ , 298 K):  $\delta$  18 (8H, *m*-H or  $-\text{CH}(\text{CH}_3)_2$ ), 3 (24H, 18-crown-6),  $-1$  (24H,  $-\text{CH}(\text{CH}_3)_2$ ),  $-16$  (6H),  $-26$  (24H,  $-\text{CH}(\text{CH}_3)_2$ ),  $-48$  (4H, *p*-H),  $-53$  (2H, backbone  $-\text{CH}$ ),  $-319$  (8H, *m*-H or  $-\text{CH}(\text{CH}_3)_2$ ).  $\mu_{\text{eff}}$  (Evans,  $\text{THF-}d_8$ , 298 K) = 6.6(1) B.M. IR (ATR, neat): 3046 (w), 3013 (w), 2952 (m), 2901 (m), 2862 (m), 1747 (w, br), 1584 (w), 1506 (m), 1456 (m), 1433 (m), 1386 (s), 1351 (m), 1317 (s), 1300 (m), 1247 (m), 1172 (m), 1099 (s), 1054 (m), 1021 (m), 964 (s), 933 (w), 884 (m), 833 (m), 797 (m), 750 (m), 707 (w), 630 (w), 536 (w), 438 (w). UV-vis ( $\text{THF}$ , 295 K,  $\epsilon$  in  $\text{mM}^{-1}\text{cm}^{-1}$ ): 369 (21), 702 (13), 891 (4.5) nm. Anal. Calcd for  $\text{C}_{82}\text{H}_{130}\text{N}_6\text{O}_9\text{Fe}_2\text{K}$ : C, 65.89; H, 8.77; N, 5.62. Found: C, 65.91; H, 8.67; N, 5.97. Mössbauer (80 K, solid): Alternating Fit:  $\delta_1 = 0.49(2)\text{ mm s}^{-1}$ ,  $|\Delta E_Q| = 1.71(2)\text{ mm s}^{-1}$ ,  $\Gamma = 0.37\text{ mm s}^{-1}$ , Rel. Area = 0.50;  $\delta_2 = 0.63(2)\text{ mm s}^{-1}$ ,  $|\Delta E_Q| = 1.75(2)\text{ mm s}^{-1}$ ,  $\Gamma = 0.47\text{ mm s}^{-1}$ , Rel. Area = 0.50. Nested Fit:  $\delta_1 = 0.54(2)\text{ mm s}^{-1}$ ,  $|\Delta E_Q| = 1.61(2)\text{ mm s}^{-1}$ ,  $\Gamma = 0.38\text{ mm s}^{-1}$ , Rel. Area = 0.50;  $\delta_2 = 0.55(2)\text{ mm s}^{-1}$ ,  $|\Delta E_Q| = 1.87(2)\text{ mm s}^{-1}$ ,  $\Gamma = 0.46\text{ mm s}^{-1}$ , Rel. Area = 0.50.

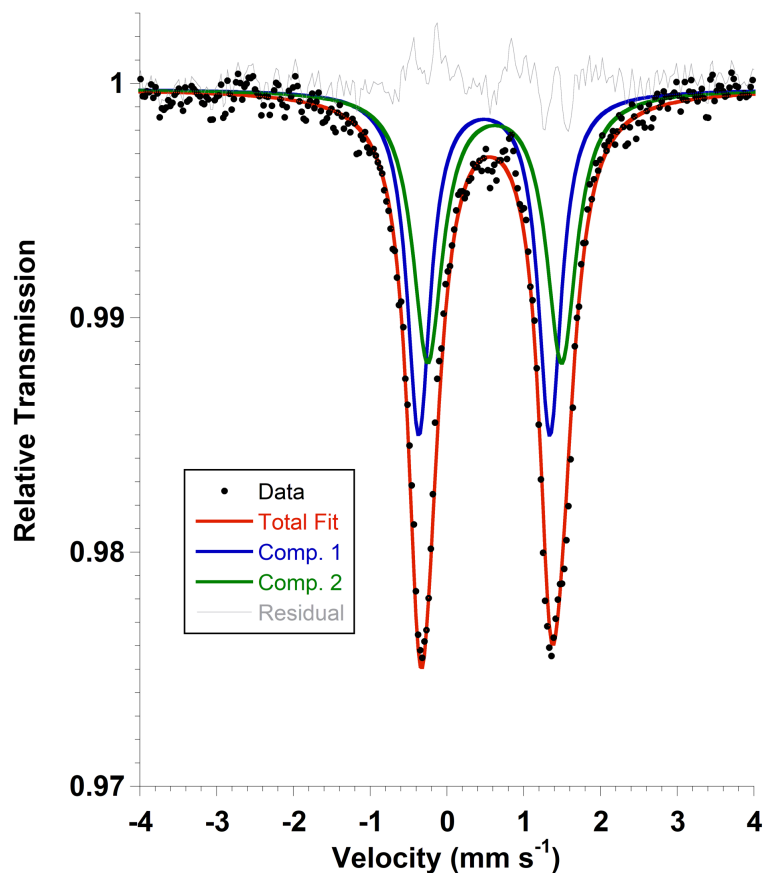

**Figure S-1.** Zero-field Mössbauer spectrum of solid  $[L^{\text{Me}}\text{Fe}(\mu\text{-N}_2)\text{FeL}^{\text{Me}}][\text{K}(18\text{-crown-6})(\text{THF})_2]$  (**2**) recorded at 80 K. This figure shows the staggered fit where the black circles represent the data, the red line is a two component simulation. The blue line represents a component with parameters  $\delta = 0.49(2)$  mm/s,  $|\Delta E_Q| = 1.71(2)$  mm/s,  $\Gamma = 0.37$ , and relative area = 0.50. The green line represents a second component with  $\delta = 0.63(2)$  mm/s,  $|\Delta E_Q| = 1.75(2)$  mm/s,  $\Gamma = 0.47$ , relative area = 0.50, and the gray line is the residual.

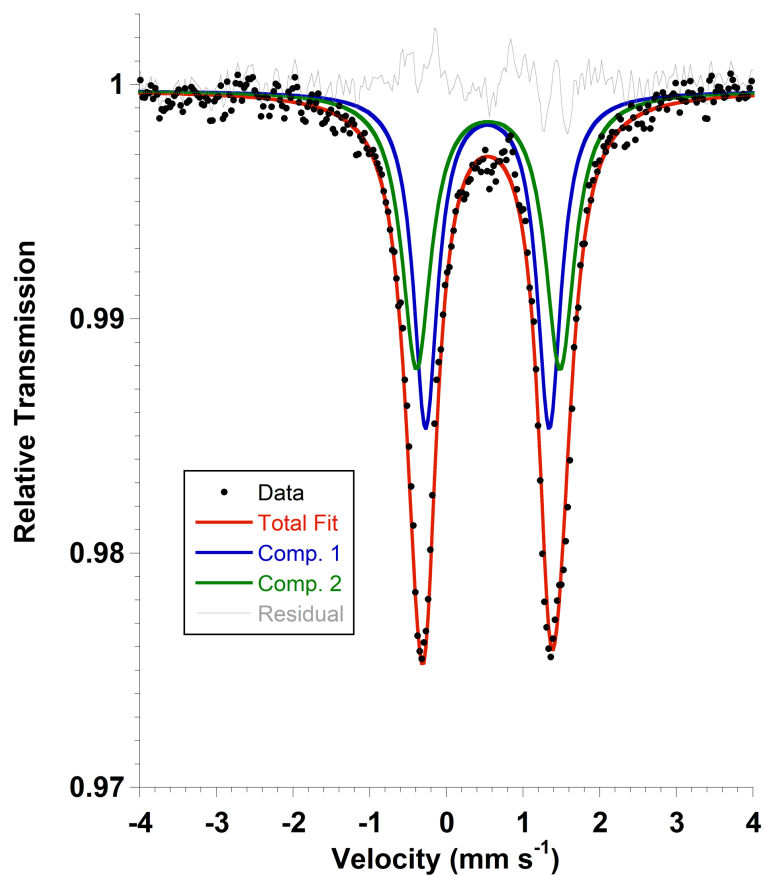

**Figure S-2.** Zero-field Mössbauer spectrum of solid  $[\text{L}^{\text{Me}}\text{Fe}(\mu\text{-N}_2)\text{FeL}^{\text{Me}}][\text{K}(18\text{-crown-6})(\text{THF})_2]$  (**2**) recorded at 80 K. This figure shows an alternative nested fit where the black circles represent the data, the red line is a two component simulation. The blue line represents a component with parameters  $\delta = 0.54(2)$  mm/s,  $|\Delta E_{\text{Q}}| = 1.61(2)$  mm/s,  $\Gamma = 0.38$ , and relative area = 0.50. The green line represents a second component with  $\delta = 0.55(2)$  mm/s,  $|\Delta E_{\text{Q}}| = 1.87(2)$  mm/s,  $\Gamma = 0.46$ , relative area = 0.50, and the gray line is the residual.

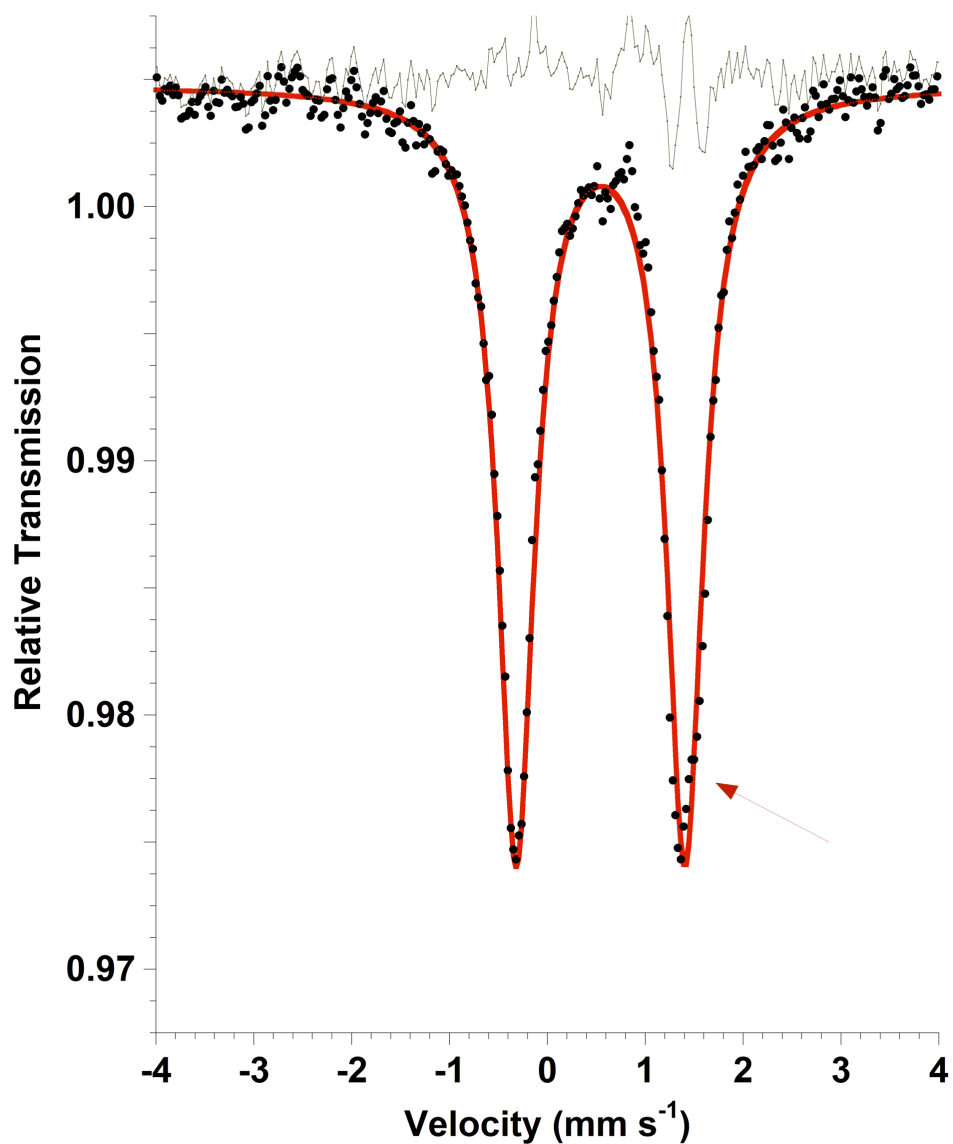

**Figure S-3.** Zero-field Mössbauer spectrum of solid  $[L^{\text{Me}}\text{Fe}(\mu\text{-N}_2)\text{FeL}^{\text{Me}}][\text{K}(18\text{-crown-6})(\text{THF})_2]$  (**2**) recorded at 80 K. This figure shows an alternative single component fit where the black circles represent the data, the red line is a one component simulation with parameters  $\delta = 0.54(2)$  mm/s,  $|\Delta E_{\text{Q}}| = 1.73(2)$  mm/s, and  $\Gamma = 0.46$  mm/s. The red arrow highlights an imperfection in the line shape indicative of more than one component, which gives a large signal in the residual.

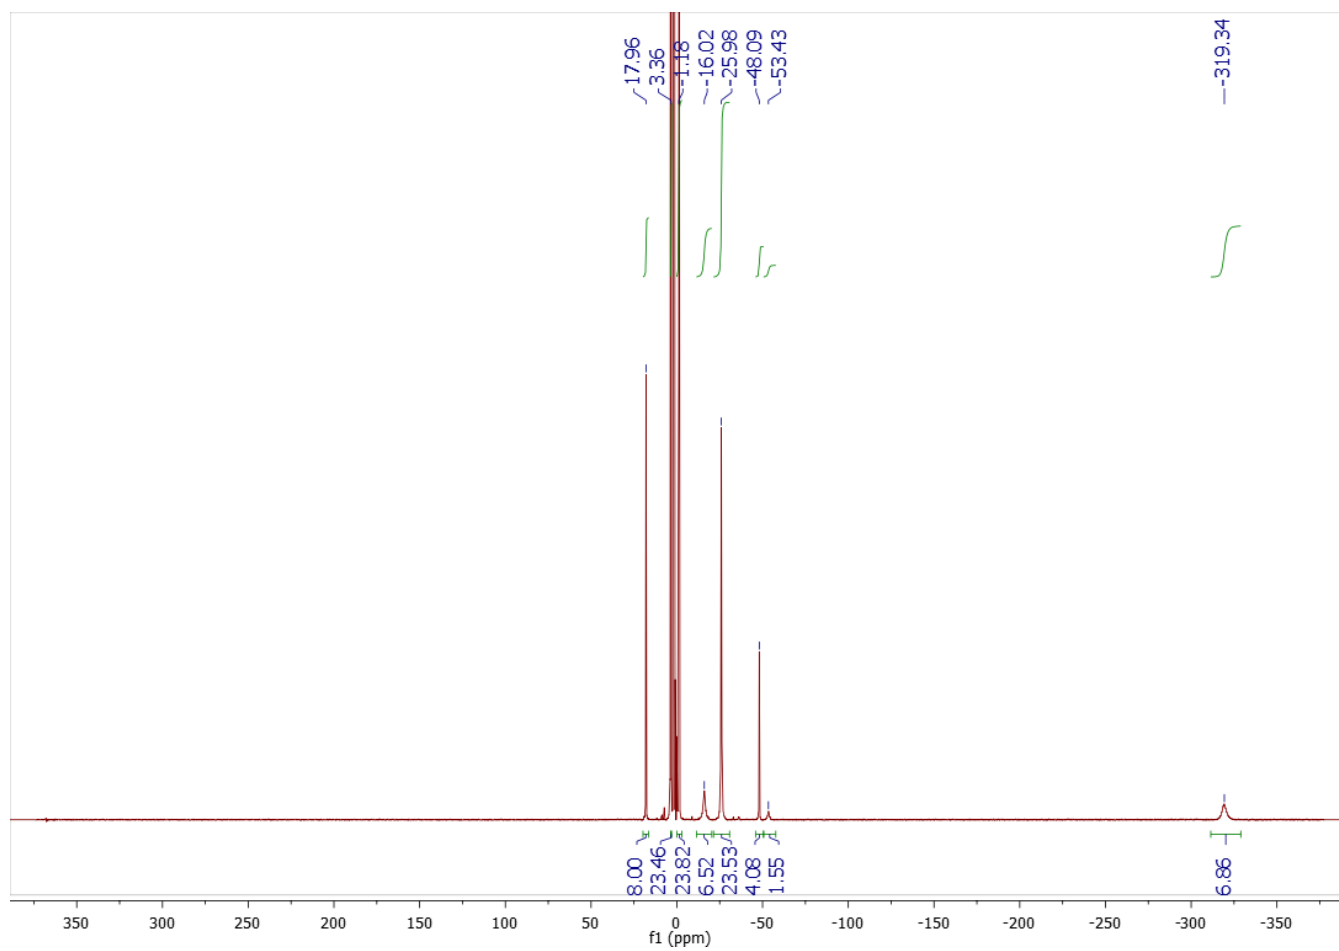

**Figure S-4.** <sup>1</sup>H NMR spectrum of [L<sup>Me</sup>Fe(μ-N<sub>2</sub>)FeL<sup>Me</sup>][K(18-crown-6)(THF)<sub>2</sub>] (**2**) in THF-*d*<sub>8</sub>.



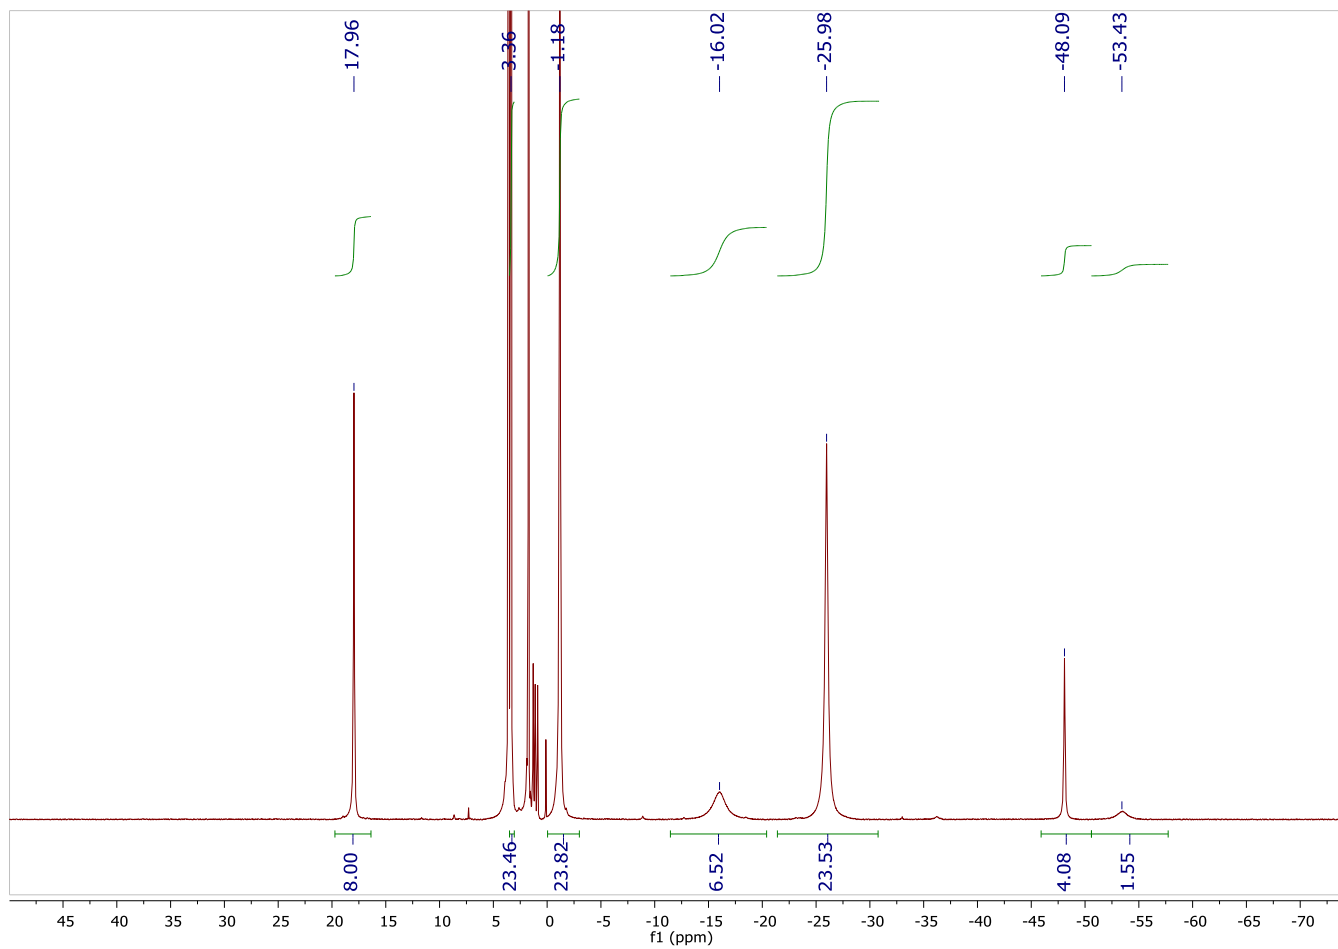

**Figure S-5.** Zoomed in  $^1\text{H}$  NMR spectrum between +50 and -80 ppm of  $[\text{L}^{\text{Me}}\text{Fe}(\mu\text{-N}_2)\text{FeL}^{\text{Me}}][\text{K}(18\text{-crown-6})(\text{THF})_2]$  (**2**) in  $\text{THF-}d_8$ .

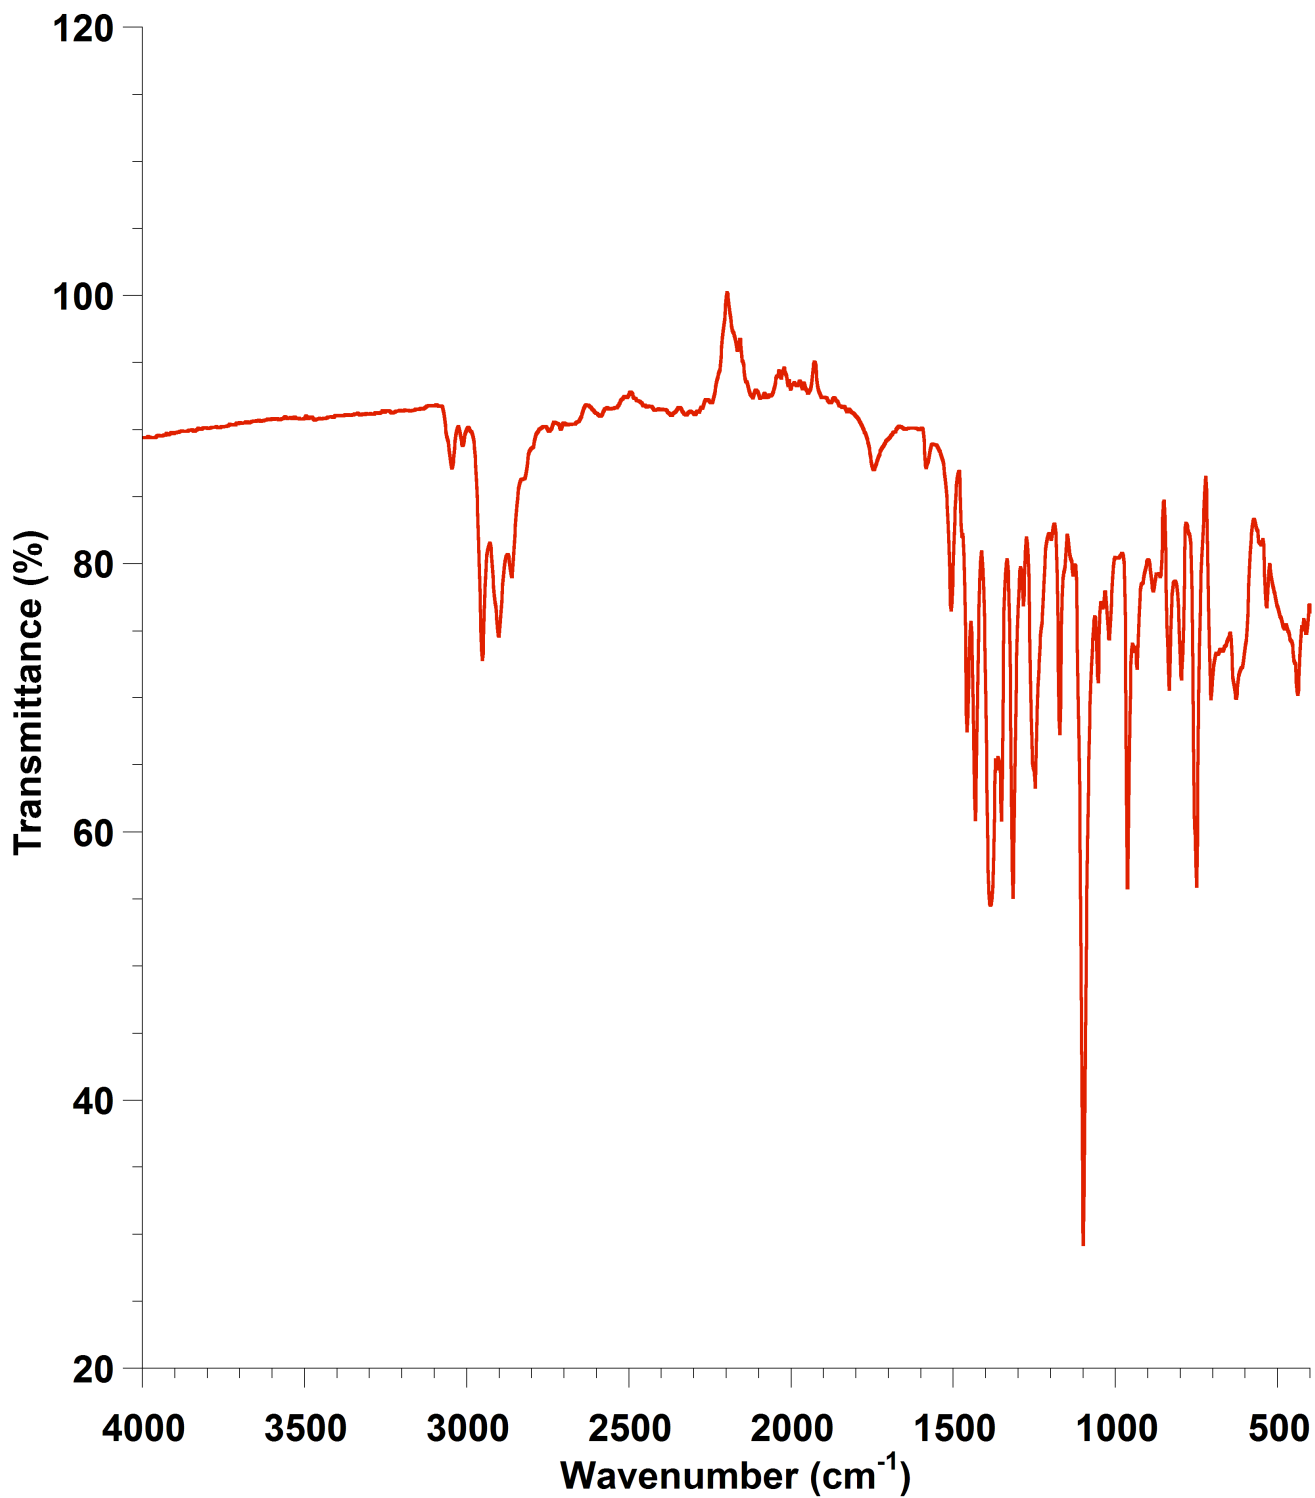

**Figure S-6.** IR spectrum (ATR) of solid  $[L^{\text{Me}}\text{Fe}(\mu\text{-N}_2)\text{FeL}^{\text{Me}}][\text{K}(18\text{-crown-6})(\text{THF})_2]$  (**2**) crystallized under natural abundance  $\text{N}_2$ .

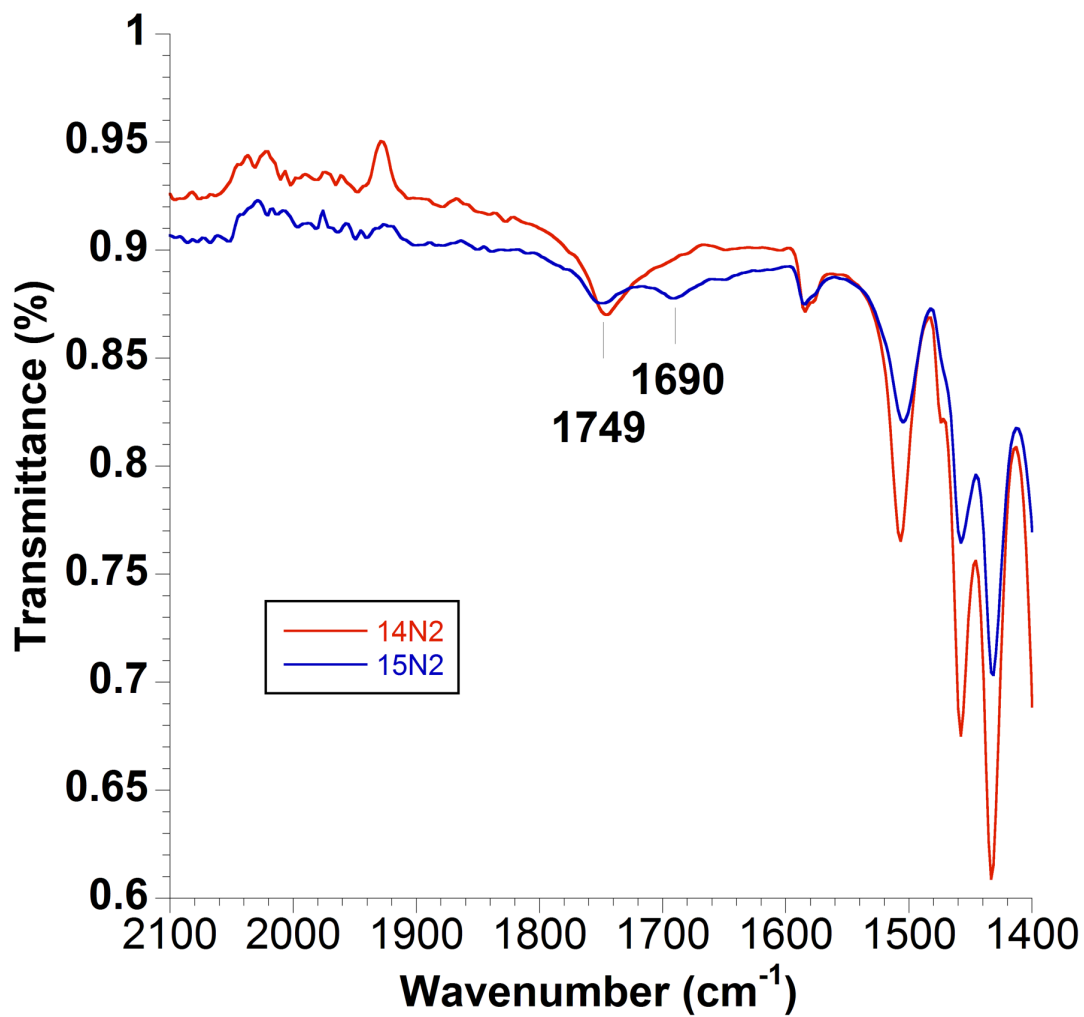

**Figure S-7.** IR spectrum (ATR) of solid  $[L^{\text{Me}}\text{Fe}(\mu\text{-N}_2)\text{FeL}^{\text{Me}}][\text{K}(18\text{-crown-6})(\text{THF})_2]$  (**2**) crystallized under natural abundance  $\text{N}_2$  (red) and  $^{15}\text{N}_2$  (blue). There is a minor peak at the  $^{14}\text{N}$  value, presumably from contamination with natural abundance nitrogen.

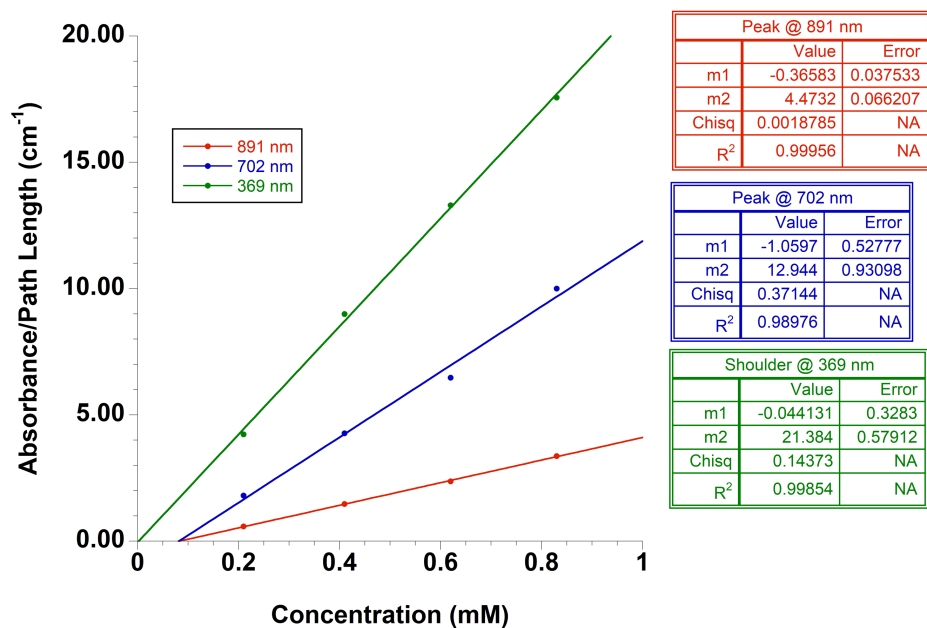

**Figure S-8:** Beer-Lambert Law plot of selected UV-vis spectral features for  $[L^{\text{Me}}\text{Fe}(\mu\text{-N}_2)\text{FeL}^{\text{Me}}][\text{K}(18\text{-crown-6})(\text{THF})_2]$  (**2**) in THF solutions. Trendline equations are in the boxes to the right.

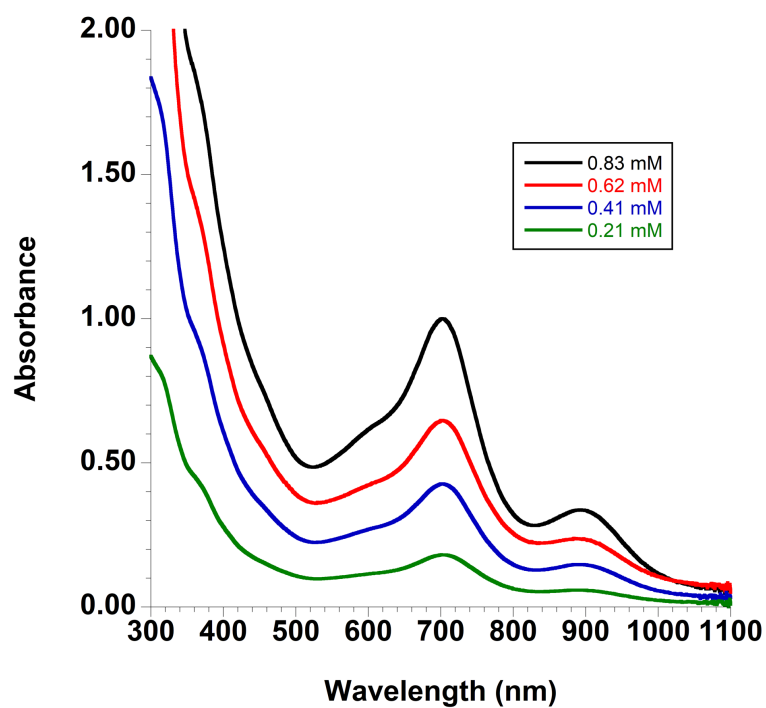

**Figure S-9:** UV-visible spectra of  $[\text{L}^{\text{Me}}\text{Fe}(\mu\text{-N}_2)\text{FeL}^{\text{Me}}][\text{K}(18\text{-crown-6})(\text{THF})_2]$  (**2**) in THF solutions at concentrations from 0.21 to 0.83 mM.

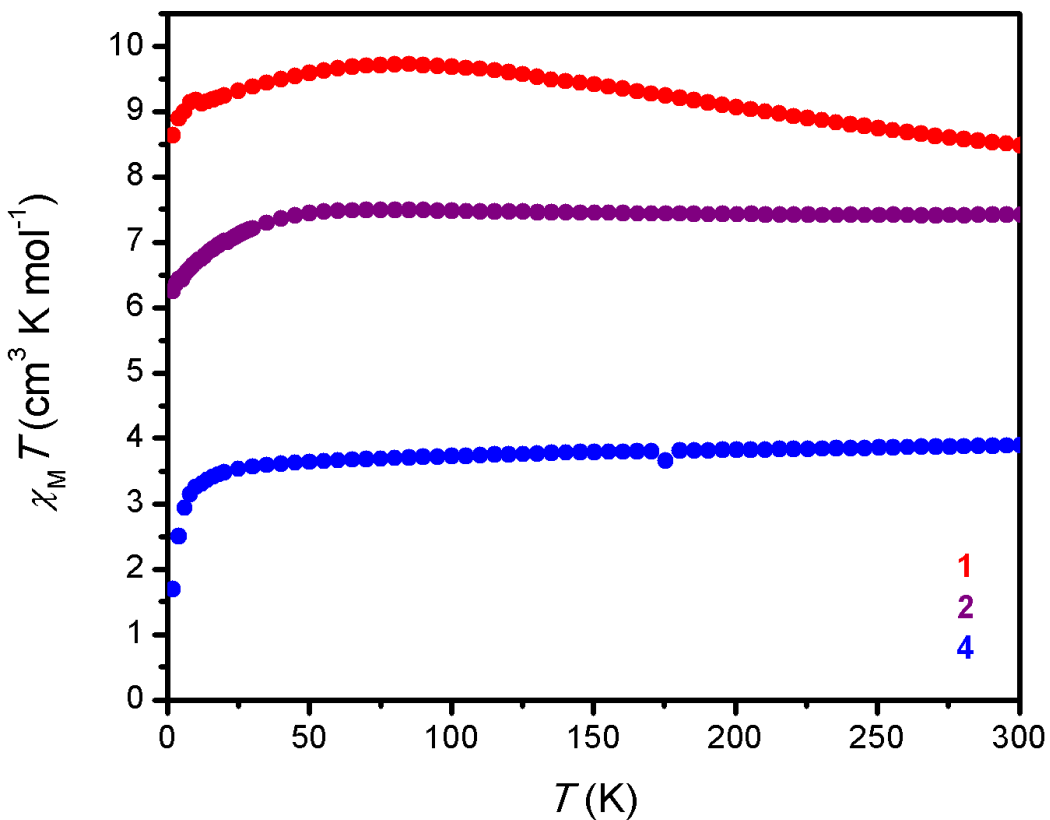

**Figure S-10.** Variable-temperature molar magnetic susceptibility times temperature ( $\chi_M T$ ) for  $[\text{L}^{\text{Me}}\text{Fe}(\mu\text{-N}_2)\text{FeL}^{\text{Me}}]$  (**1**) (red),  $[\text{L}^{\text{Me}}\text{Fe}(\mu\text{-N}_2)\text{FeL}^{\text{Me}}][\text{K}(\text{18-crown-6})(\text{THF})_2]$  (**2**) (purple), and  $\text{K}_2[\text{L}^{\text{Me}}\text{Fe}(\mu\text{-N}_2)\text{FeL}^{\text{Me}}]$  (**4**), (blue). All data were collected under an applied field of 1000 Oe.

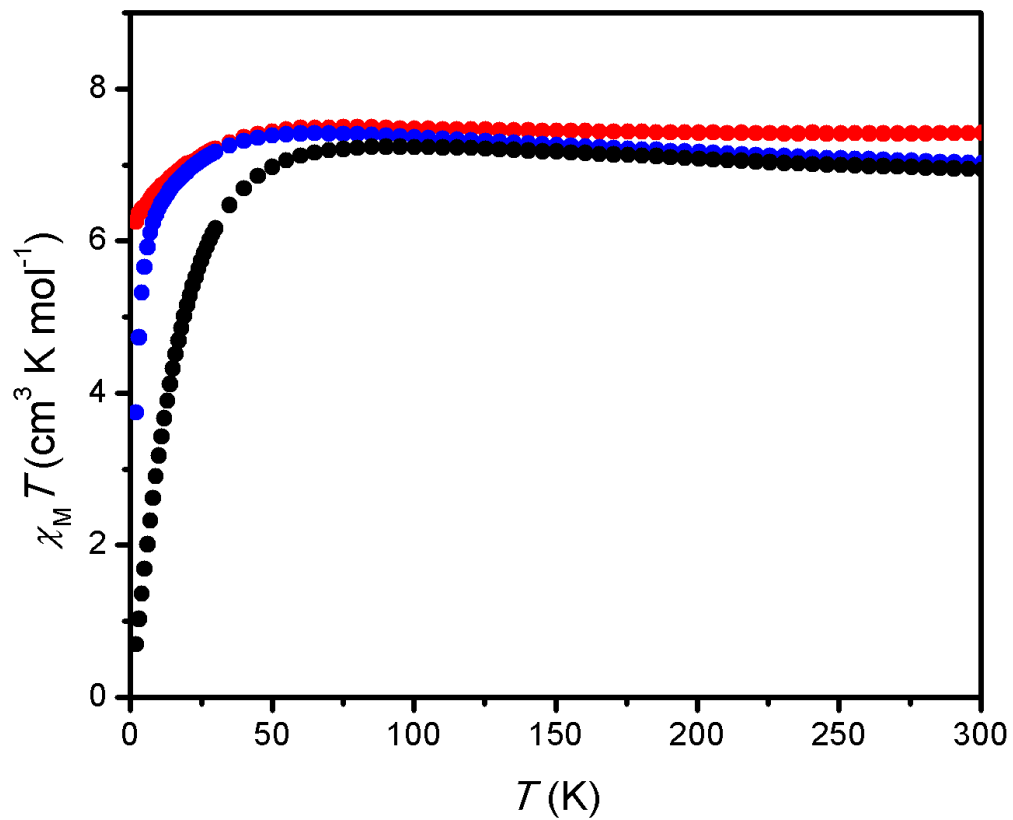

**Figure S-11.** Variable-temperature molar magnetic susceptibility times temperature ( $\chi_M T$ ) for  $[\text{L}^{\text{Me}}\text{Fe}(\mu\text{-N}_2)\text{FeL}^{\text{Me}}][\text{K}(18\text{-crown-6})(\text{THF})_2]$  (**2**) under applied fields of 0.1 T (red), 1 T (blue), and 7 T (black).

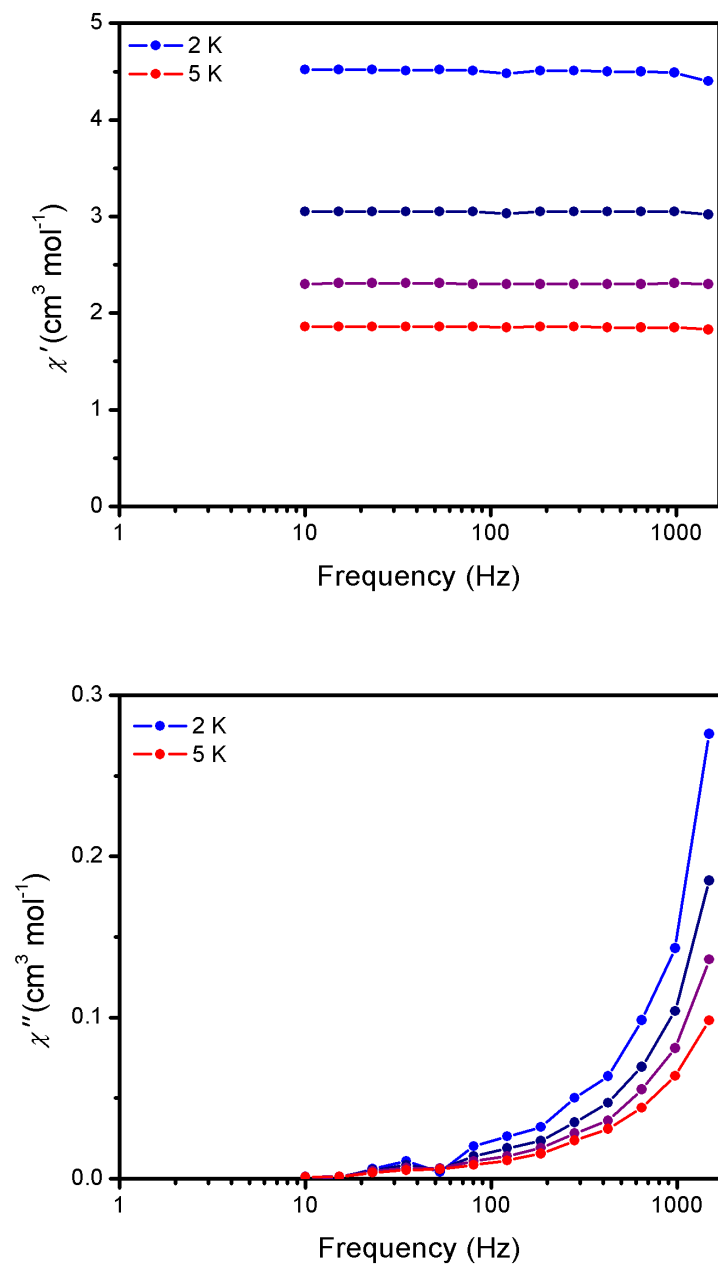

**Figure S-12.** In-phase ( $\chi'$ ) and out-of-phase ( $\chi''$ ) magnetic susceptibility for  $[\text{L}^{\text{Me}}\text{Fe}(\mu\text{-N}_2)\text{FeL}^{\text{Me}}]$  (**1**) collected under zero applied dc field from 2 to 5 K. The lines are a guide for the eye.



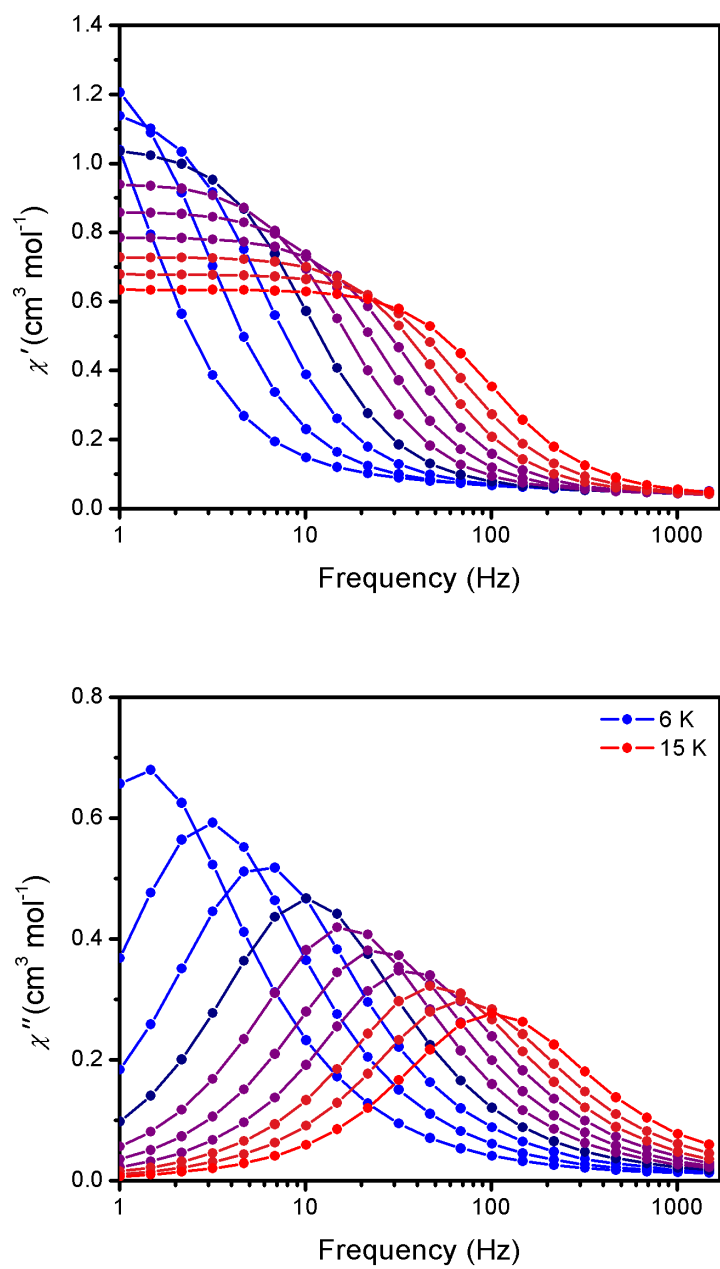

**Figure S-13.** In-phase ( $\chi'$ ) and out-of-phase ( $\chi''$ ) magnetic susceptibility for  $[\text{L}^{\text{Me}}\text{Fe}(\mu\text{-N}_2)\text{FeL}^{\text{Me}}]$  (**1**) collected under a 500 Oe dc field from 6 to 15 K. The lines are a guide for the eye.

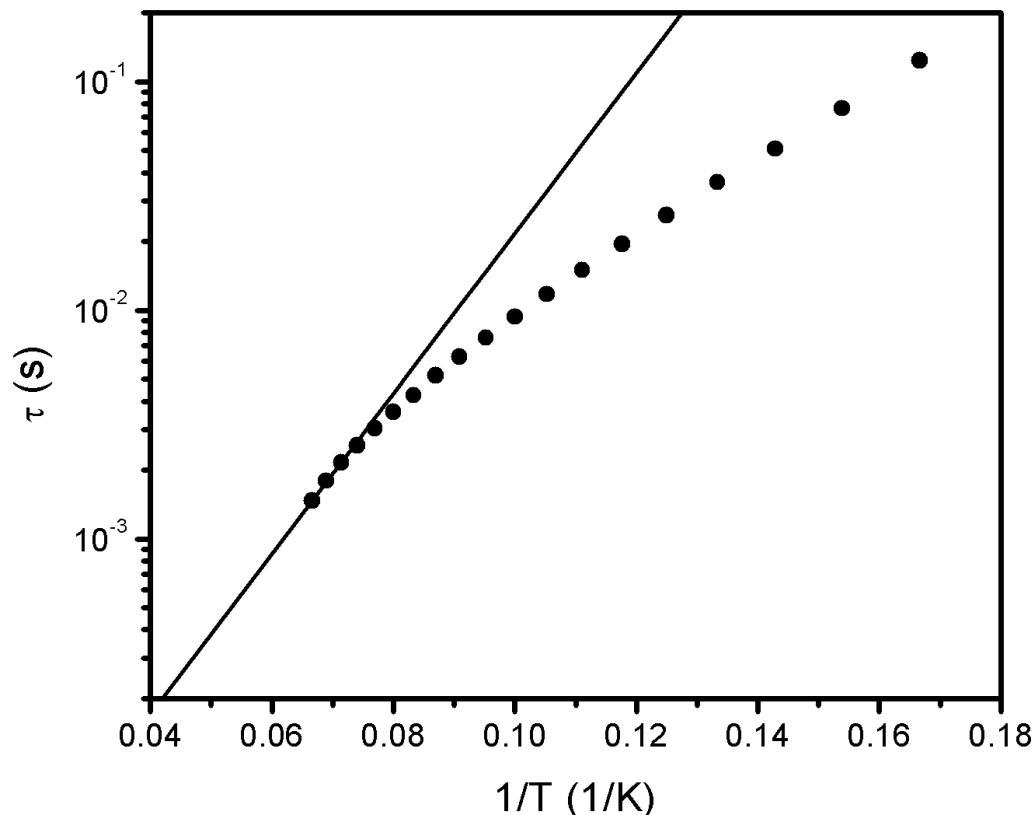

**Figure S-14.** Arrhenius plot for  $[\text{L}^{\text{Me}}\text{Fe}(\mu\text{-N}_2)\text{FeL}^{\text{Me}}]$  (**1**) with data collected under a 500 Oe applied dc field. The line depicts the temperature dependence for an Orbach relaxation process with  $U_{\text{eff}} = 56.1 \text{ cm}^{-1}$  and  $\tau_0 = 6.8 \times 10^{-6} \text{ s}$ .

Orbach relaxation processes were modeled in all Arrhenius plots using  $\tau = \tau_0 \exp(U_{\text{eff}}/k_{\text{B}}T)$ , where  $\tau$  is the relaxation time,  $\tau_0$  is the attempt time, and  $U_{\text{eff}}$  is the effective spin-reversal barrier. Large values of  $\tau_0$  ( $>10^{-7} \text{ s}$ ) likely indicate that the complex is not relaxing exclusively through an Orbach mechanism and that through-barrier processes are still contributing. As such, the values given for  $U_{\text{eff}}$  and  $\tau_0$  are lower and upper limits, respectively.

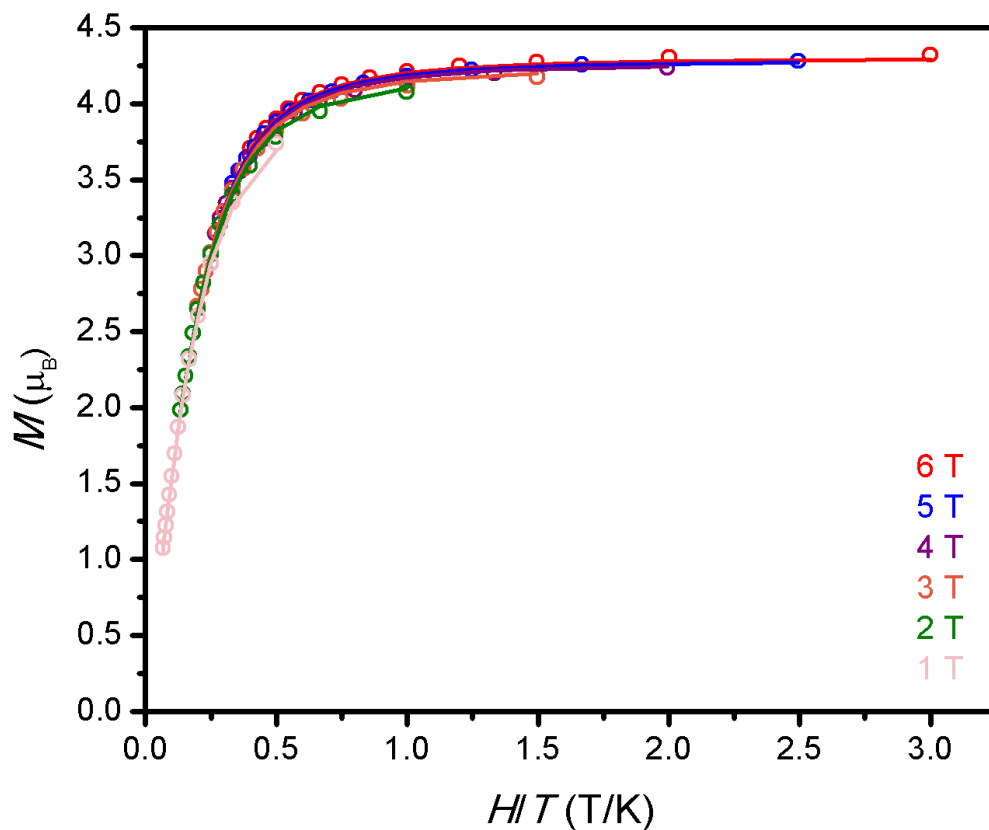

**Figure S-15.** Reduced magnetization data for  $[\text{L}^{\text{Me}}\text{Fe}(\mu\text{-N}_2)\text{FeL}^{\text{Me}}]$  (**1**) collected at temperatures from 2 to 15 K under dc fields of 1-6 T; solid lines fits using the parameters:  $D = -45.0 \text{ cm}^{-1}$ ,  $|E/D| = -10.8 \text{ cm}^{-1}$ ,  $g_{\parallel} = 2.86$ ,  $g_{\perp} = 1.40$ .

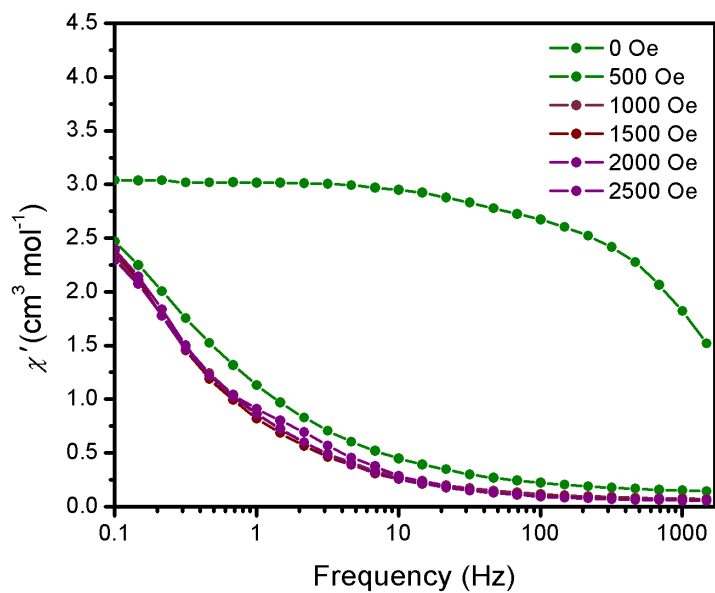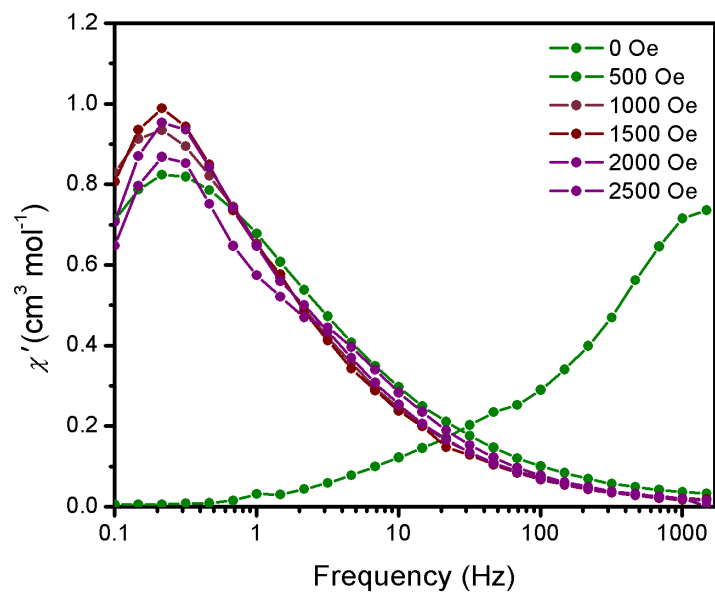

**Figure S-16.** In-phase ( $\chi'$ ) and out-of-phase ( $\chi''$ ) magnetic susceptibility for  $[\text{L}^{\text{Me}}\text{Fe}(\mu\text{-N}_2)\text{FeL}^{\text{Me}}][\text{K}(18\text{-crown-6})(\text{THF})_2]$  (**2**) collected at 2 K under applied dc fields of 0-2500 Oe. The lines are a guide for the eye.

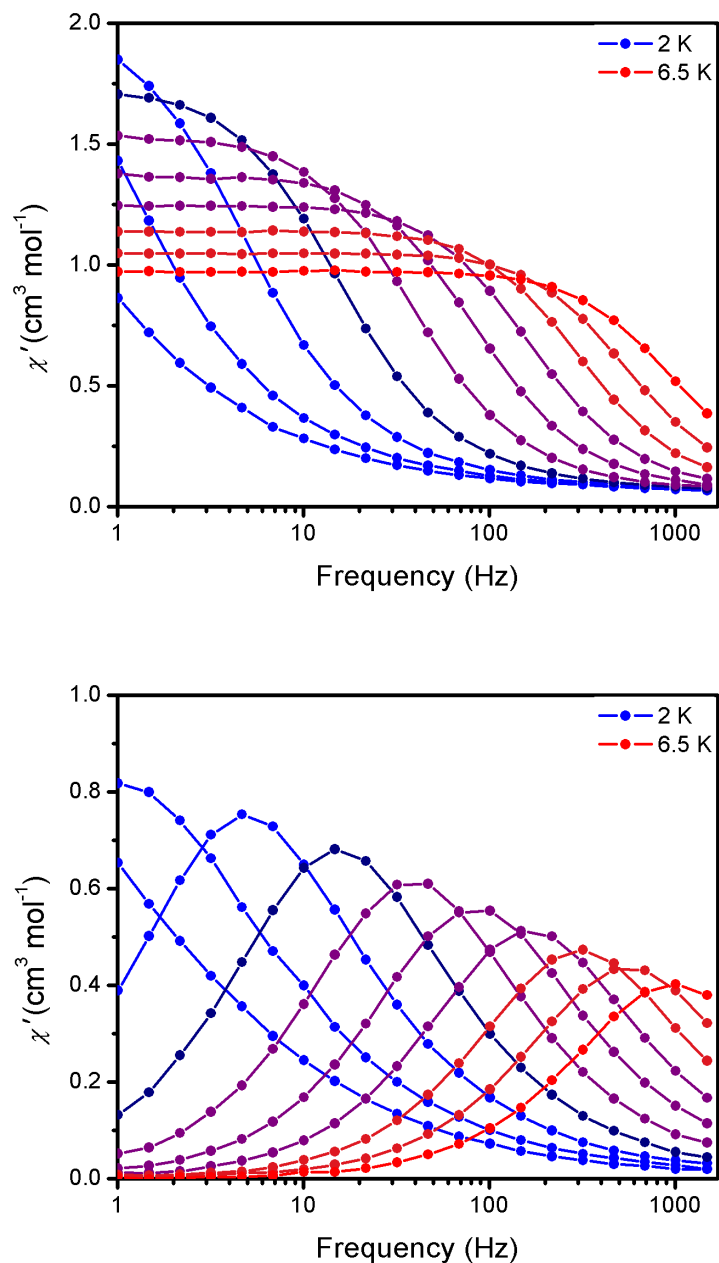

**Figure S-17.** In-phase ( $\chi'$ ) and out-of-phase ( $\chi''$ ) magnetic susceptibility for  $[\text{L}^{\text{Me}}\text{Fe}(\mu\text{-N}_2)\text{FeL}^{\text{Me}}][\text{K}(18\text{-crown-6})(\text{THF})_2]$  (**2**) collected under a 1000 Oe dc field from 2 to 6.5 K. The lines are a guide for the eye.

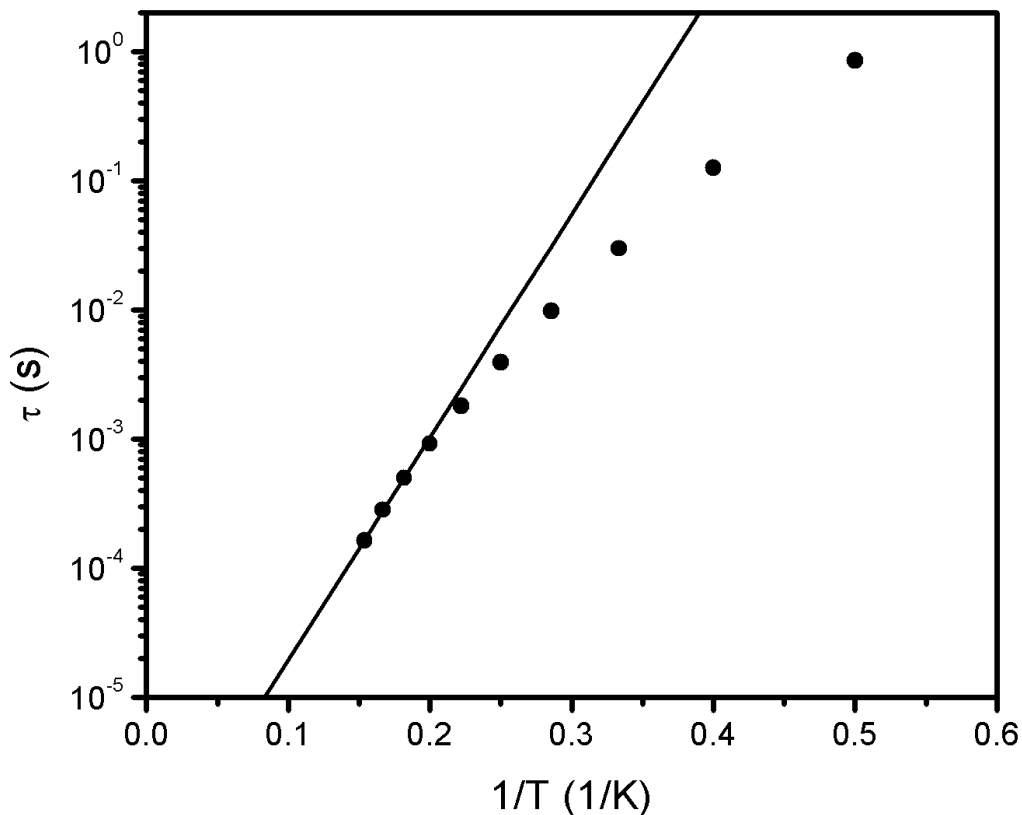

**Figure S-18.** Arrhenius plot for  $[\text{L}^{\text{Me}}\text{Fe}(\mu\text{-N}_2)\text{FeL}^{\text{Me}}][\text{K}(18\text{-crown-6})(\text{THF})_2]$  (**2**) with data collected under a 1000 Oe applied dc field. The line depicts the temperature dependence for an Orbach relaxation process with  $U_{\text{eff}} = 27.6 \text{ cm}^{-1}$  and  $\tau_0 = 3.6 \times 10^{-7} \text{ s}$ .

Orbach relaxation processes were modeled in all Arrhenius plots using  $\tau = \tau_0 \exp(U_{\text{eff}}/k_{\text{B}}T)$ , where  $\tau$  is the relaxation time,  $\tau_0$  is the attempt time, and  $U_{\text{eff}}$  is the effective spin-reversal barrier. Large values of  $\tau_0$  ( $>10^{-7} \text{ s}$ ) likely indicate that the complex is not relaxing exclusively through an Orbach mechanism and that through-barrier processes are still contributing. As such, the values given for  $U_{\text{eff}}$  and  $\tau_0$  are lower and upper limits, respectively.

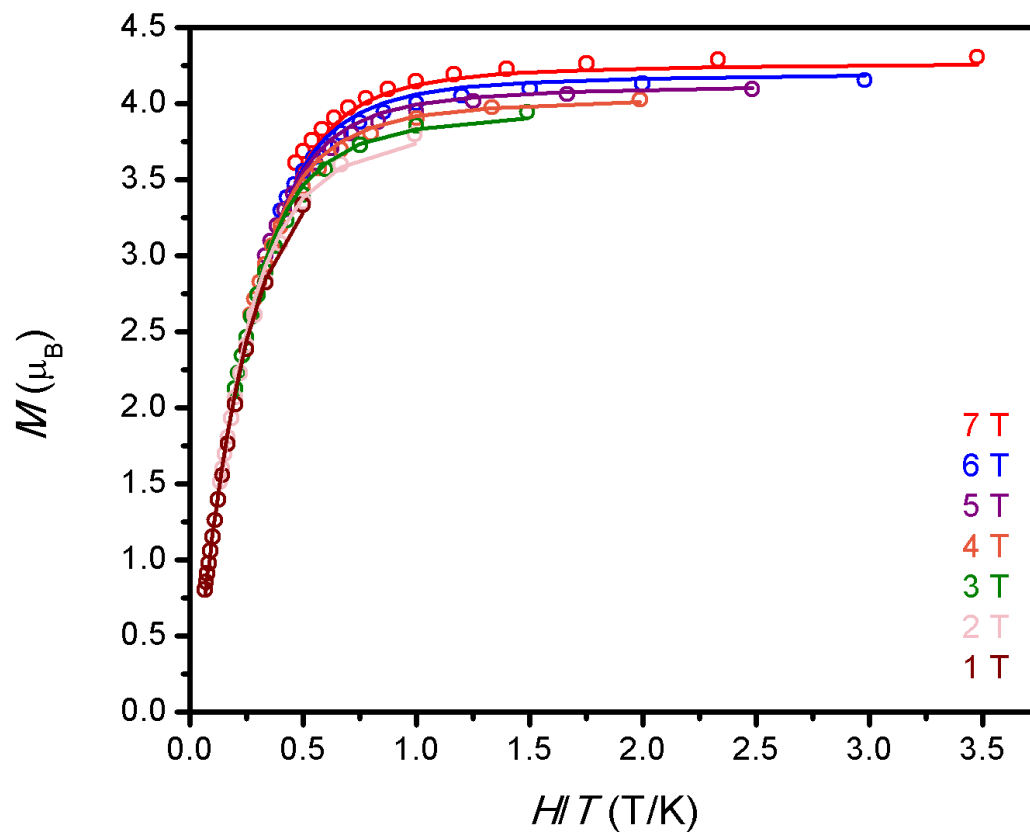

**Figure S-19.** Reduced magnetization data for  $[\text{L}^{\text{Me}}\text{Fe}(\mu\text{-N}_2)\text{FeL}^{\text{Me}}][\text{K}(18\text{-crown-6})(\text{THF})_2]$  (**2**) collected at temperatures from 2 to 15 K under dc fields of 1-7 T. Solid lines are fits using the parameters:  $D = -4.5 \text{ cm}^{-1}$ ,  $|E/D| = 0.29$ ,  $g_{\parallel} = 2.96$ ,  $g_{\perp} = 1.51$ .

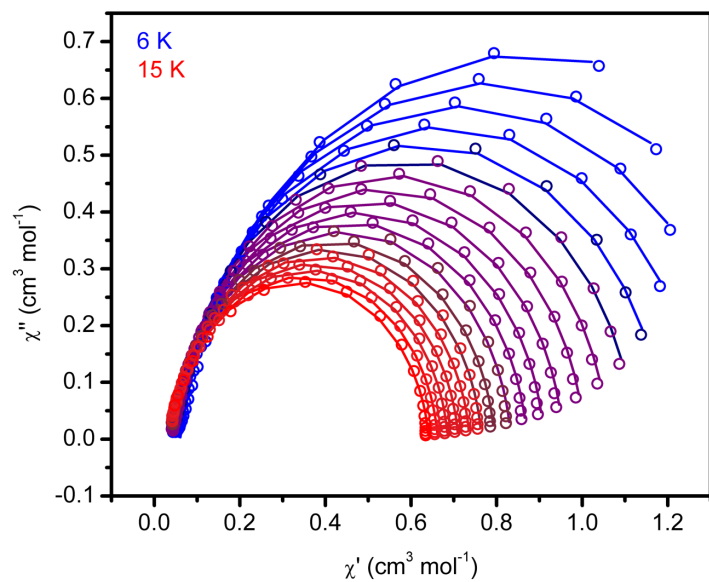

**Figure S-20.** Cole-Cole plot for ac magnetic susceptibility for **1**.

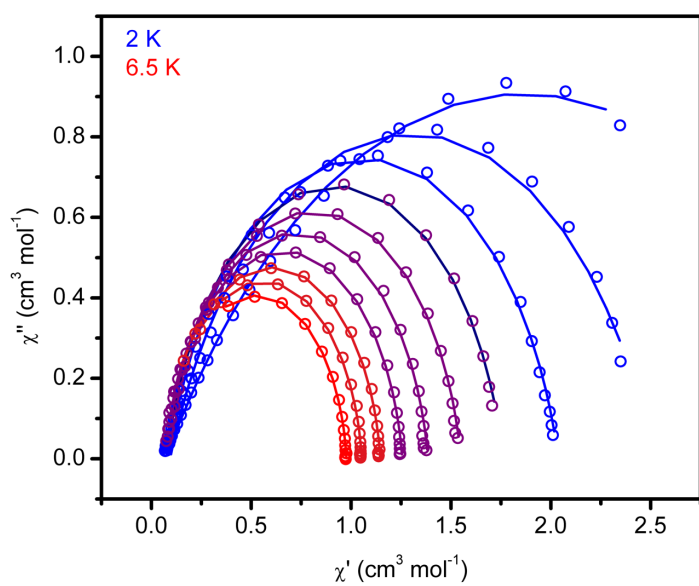

**Figure S-21.** Cole-Cole plot for ac magnetic susceptibility for **2**.



## Additional information on relaxation fitting

In single-molecule magnetism literature since 2010,<sup>7</sup> relaxation data have been fit to a model originally developed by Orbach<sup>8</sup> and others<sup>9</sup> in which relaxation is attributed to a combination of relaxation mechanisms using the equation:

$$\tau^{-1} = AH^m T + CT^n + \tau_0^{-1} \exp\left(-\frac{U_{eff}}{k_B T}\right)$$

where the three terms represent direct, Raman, and Orbach relaxation, respectively,  $H$  is the applied field,  $\tau_0$  is the attempt time, and  $U_{eff}$  is the thermal barrier to spin reversal. The relaxation data for **1** and **2** can be fit solely with the Raman term (Table S1), as shown in Figures S23 and S24. We have included these fits so these data can be compared to previous analyses. Data were fit by minimizing the sum of the squares of the errors in the natural log vs. inverse temperature plot; as such the standard error of the estimate ( $\sigma_{est}$ ) is given in terms of  $\ln(\tau)$ .

More recent work in single-molecule magnetism, however, has explained the breakdown of the assumptions in Orbach's model, and proposed a new model that addresses these shortcomings.<sup>10</sup> Accurate fitting of the relaxation data within this new model requires knowledge of the low energy phonon spectrum for the system and the spin-phonon coupling terms of each phonon. As this analysis is not trivial, we have opted to simply give lower and upper limits for  $U_{eff}$  and  $\tau_0$ , respectively.

**Table S-1.** Parameters for the relaxation data of **1** and **2** fit by Raman relaxation.

|          | $C$ ( $s^{-1} K^{-n}$ ) | $n$ | $\sigma_{est}(\ln \tau)$ |
|----------|-------------------------|-----|--------------------------|
| <b>1</b> | $2.3 \times 10^{-3}$    | 4.6 | $7.2 \times 10^{-2}$     |
| <b>2</b> | $1.1 \times 10^{-2}$    | 7.1 | $1.4 \times 10^{-1}$     |

**Table S-2.** Fits of low temperature magnetization data of **1** obtained using the program PHI.

| $D$<br>( $cm^{-1}$ ) | $ E/D $ | $g_{\parallel}$ | $g_{\perp}$ | Residual<br>( $\times 10^{-2}$ ) |
|----------------------|---------|-----------------|-------------|----------------------------------|
| -45.0                | 0.24    | 2.86            | 1.40        | 2.76                             |
| -63.2                | 0.21    | 2.85            | 1.68        | 2.76                             |
| -47.5                | 0.22    | 2.83            | 2.00        | 3.64                             |
| -38.1                | 0.22    | 2.82            | 1.90        | 4.36                             |
| -19.8                | 0.025   | 2.80            | 1.36        | 5.96                             |
| -35.5                | 0.077   | 2.80            | 1.80        | 5.96                             |
| -45.3                | 0.069   | 2.80            | 2.02        | 5.97                             |
| -43.7                | 0.013   | 2.80            | 2.00        | 5.97                             |

**Table S-3.** Fits of low temperature magnetization data of **2** obtained using the program PHI.

| $D$<br>( $cm^{-1}$ ) | $ E/D $ | $g_{\parallel}$ | $g_{\perp}$ | Residual<br>( $\times 10^{-2}$ ) |
|----------------------|---------|-----------------|-------------|----------------------------------|
| -4.5                 | 0.29    | 2.96            | 1.51        | 25.7                             |

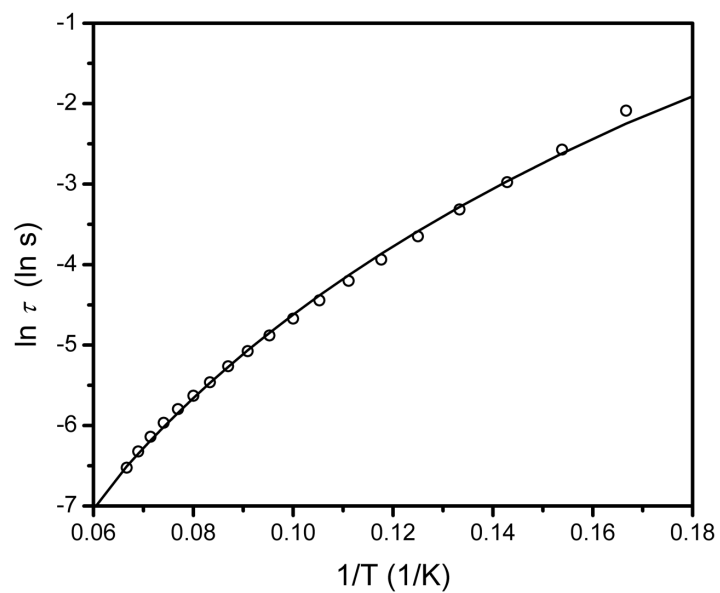

**Figure S-22.** Arrhenius plot of the magnetic relaxation times of **1** with a fit (solid line) using only Raman relaxation.

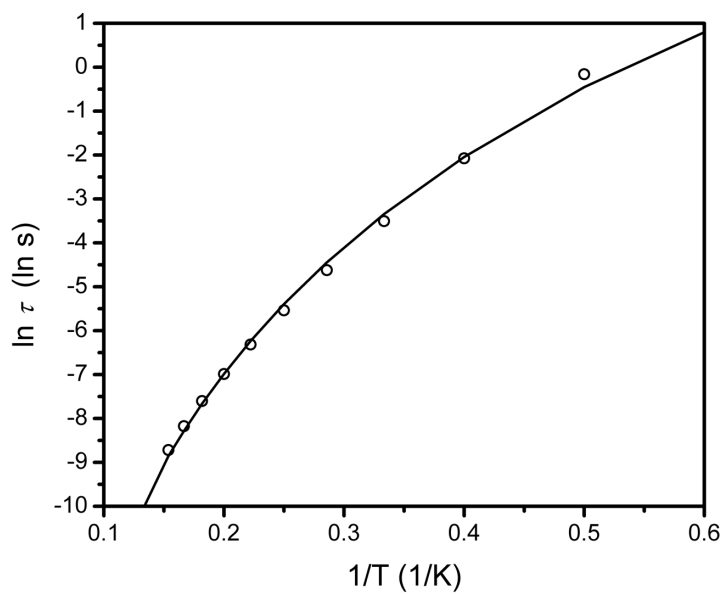

**Figure S-23.** Arrhenius plot of the magnetic relaxation times of **2** with a fit (solid line) using only Raman relaxation.

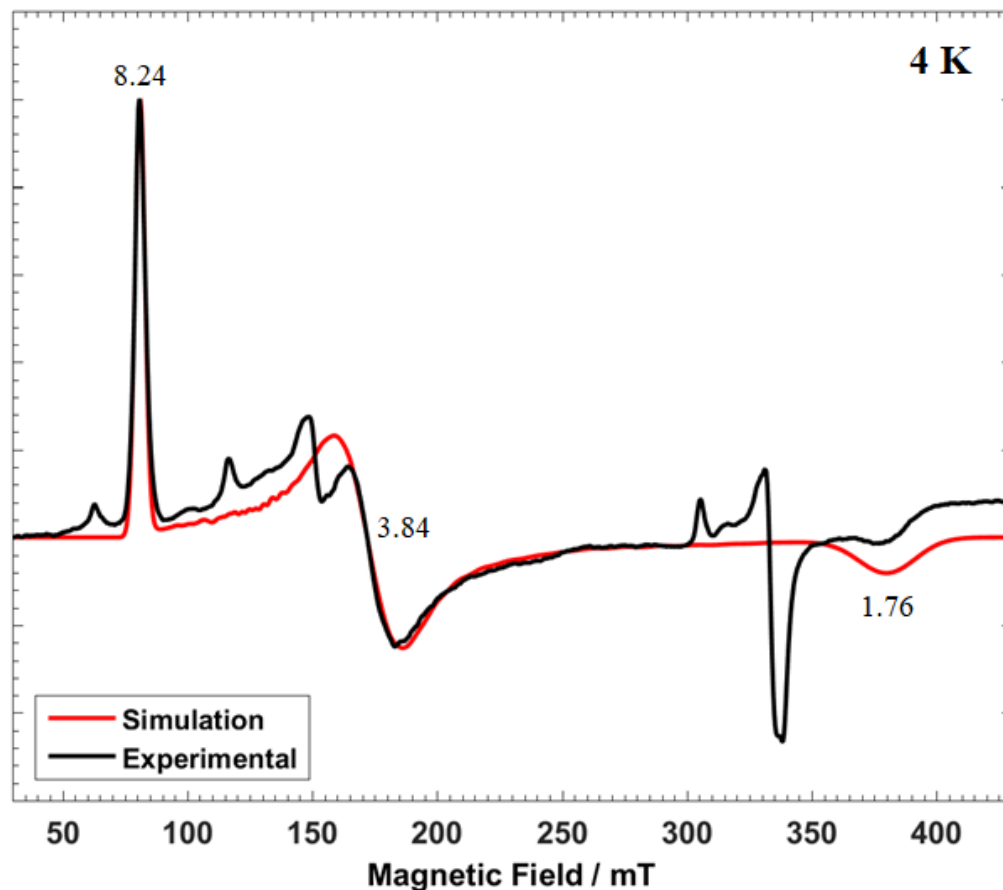

**Figure S-24.** Derivative X-band EPR spectra of 2 mM samples of **2** in a 1:1 mixture of THF and 2-methylTHF at 4 K (microwave frequency, 9.3734 GHz; power, 30 mW; modulation amplitude, 10 G). The spectra show the presence of several signals from the ' $m_s = \pm 1/2$ ' ground state doublet of a  $S = 5/2$  spin state with a positive  $D$ , with  $D \gg h\nu$  (microwave quantum). The dominant signal with effective g-values,  $\mathbf{g}' = 8.24, 3.84, 1.76$  comes from centers with  $E/D = 0.097$  as demonstrated in the EasySpin simulation (simulation parameters:  $lw = 2.6$  MHz,  $\mathbf{g} = [2.07, 2.07, 2.04]$ ,  $D = +6.2$  cm $^{-1}$ ,  $E = 0.6014$ ,  $DStrain = [8000; 4500]$  MHz).<sup>11</sup> In addition there is a minority  $S = 1/2$  impurity signal in the range 300-350 mT.

**Crystallography of 2.** Low-temperature diffraction data ( $\omega$ -scans) were collected on a Rigaku MicroMax-007HF diffractometer coupled to a Saturn994+ CCD detector with Cu K $\alpha$  ( $\lambda = 1.54178 \text{ \AA}$ ) for the structure of 007b-18084. The diffraction images were processed and scaled using Rigaku Oxford Diffraction software (CrysAlisPro; Rigaku: The Woodlands, TX, 2015). The structure was solved with SHELXT and was refined against  $F^2$  on all data by full-matrix least squares with SHELXL.<sup>12</sup> All non-hydrogen atoms were refined anisotropically. Hydrogen atoms were included in the model at geometrically calculated positions and refined using a riding model. The isotropic displacement parameters of all hydrogen atoms were fixed to 1.2 times the U value of the atoms to which they are linked (1.5 times for methyl groups). The full numbering scheme of **2** can be found in the CIF. The structure has been deposited with the CCSD with accession code 1866500.

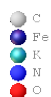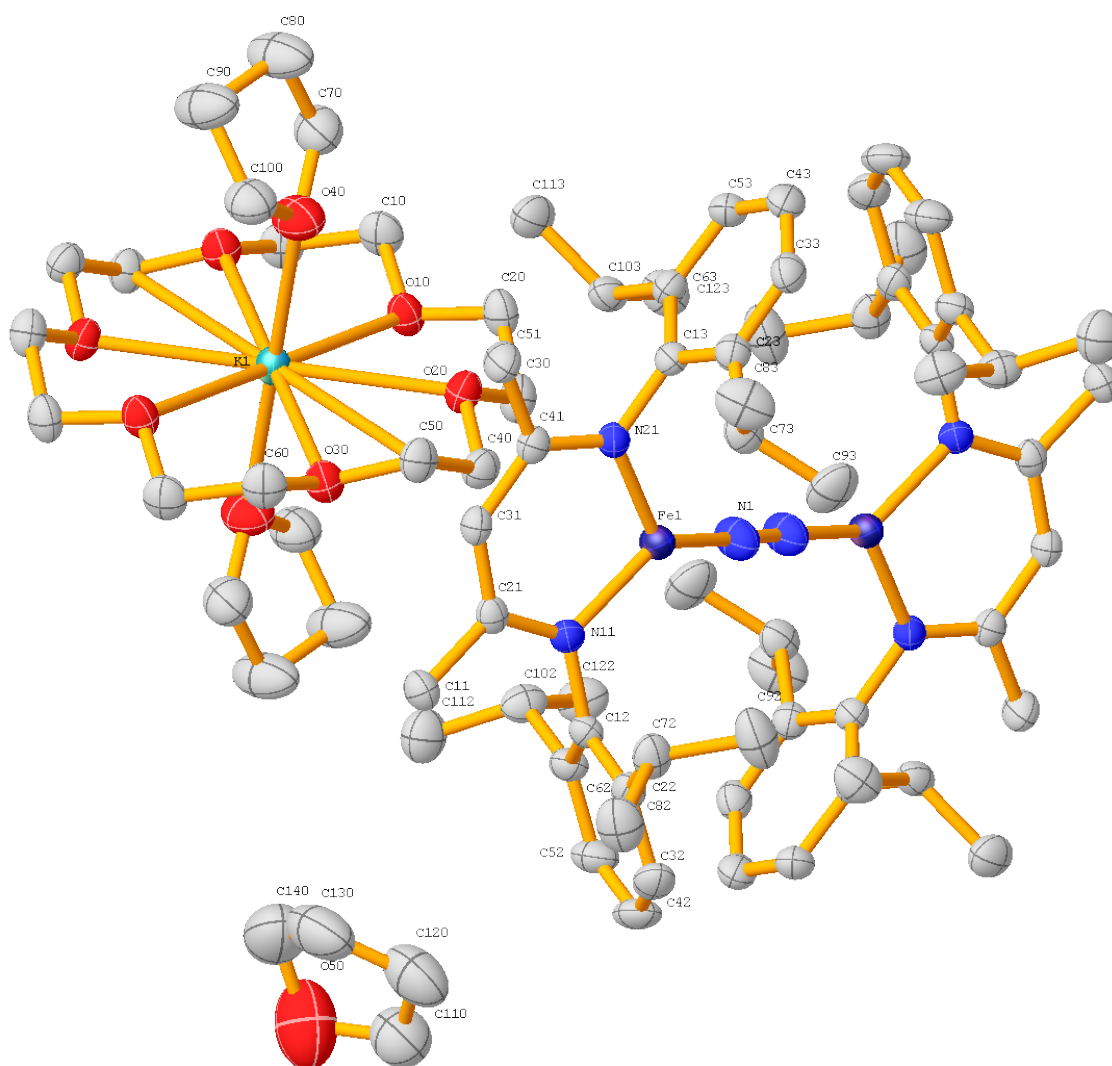

**Figure S-25.** The complete numbering scheme of **2** with 50% thermal ellipsoid probability levels. The hydrogen atoms are shown as circles for clarity. The molecule lies on a crystallographic special position; the unit half is labeled above.

**Table S-4.** Crystal data and structure refinement for **2**.

|                                   |                                                                                   |                 |
|-----------------------------------|-----------------------------------------------------------------------------------|-----------------|
| Identification code               | 007b-18084                                                                        |                 |
| Empirical formula                 | C <sub>86</sub> H <sub>136</sub> Fe <sub>2</sub> K N <sub>6</sub> O <sub>10</sub> |                 |
| Formula weight                    | 1564.80                                                                           |                 |
| Temperature                       | 93(2) K                                                                           |                 |
| Wavelength                        | 1.54184 Å                                                                         |                 |
| Crystal system                    | Triclinic                                                                         |                 |
| Space group                       | P-1                                                                               |                 |
| Unit cell dimensions              | a = 13.1435(5) Å                                                                  | α = 66.914(4)°. |
|                                   | b = 13.7367(6) Å                                                                  | β = 88.232(3)°. |
|                                   | c = 14.6446(7) Å                                                                  | γ = 68.744(4)°. |
| Volume                            | 2247.66(19) Å <sup>3</sup>                                                        |                 |
| Z                                 | 1                                                                                 |                 |
| Density (calculated)              | 1.156 Mg/m <sup>3</sup>                                                           |                 |
| Absorption coefficient            | 3.439 mm <sup>-1</sup>                                                            |                 |
| F(000)                            | 845                                                                               |                 |
| Crystal size                      | 0.130 x 0.080 x 0.050 mm <sup>3</sup>                                             |                 |
| Crystal color and habit           | Green Block                                                                       |                 |
| Diffractometer                    | Rigaku Saturn 944+ CCD                                                            |                 |
| Theta range for data collection   | 3.309 to 66.589°.                                                                 |                 |
| Index ranges                      | -15 ≤ h ≤ 15, -16 ≤ k ≤ 16, -17 ≤ l ≤ 17                                          |                 |
| Reflections collected             | 78976                                                                             |                 |
| Independent reflections           | 7822 [R(int) = 0.0614]                                                            |                 |
| Observed reflections (I > 2σ(I))  | 6944                                                                              |                 |
| Completeness to theta = 66.589°   | 98.5 %                                                                            |                 |
| Absorption correction             | Semi-empirical from equivalents                                                   |                 |
| Max. and min. transmission        | 1.00000 and 0.72604                                                               |                 |
| Solution method                   | SHELXT-2014/5                                                                     |                 |
| Refinement method                 | SHELXL-2014/7                                                                     |                 |
| Data / restraints / parameters    | 7822 / 0 / 485                                                                    |                 |
| Goodness-of-fit on F <sup>2</sup> | 1.070                                                                             |                 |
| Final R indices [I > 2σ(I)]       | R1 = 0.0601, wR2 = 0.1587                                                         |                 |
| R indices (all data)              | R1 = 0.0685, wR2 = 0.1663                                                         |                 |
| Largest diff. peak and hole       | 0.702 and -0.543 e.Å <sup>-3</sup>                                                |                 |

**Table S-5.** Atomic coordinates ( $\times 10^4$ ) and equivalent isotropic displacement parameters ( $\text{\AA}^2 \times 10^3$ ) for **2**.  $U(\text{eq})$  is defined as one third of the trace of the orthogonalized  $U^{ij}$  tensor.

|        | x       | y       | z       | U(eq) |
|--------|---------|---------|---------|-------|
| Fe(1)  | 4874(1) | 4465(1) | 8691(1) | 29(1) |
| N(1)   | 4966(2) | 4837(3) | 9686(2) | 43(1) |
| N(11)  | 5990(2) | 3784(2) | 7990(2) | 27(1) |
| N(21)  | 3586(2) | 4941(2) | 7769(2) | 27(1) |
| C(11)  | 6671(3) | 3397(3) | 6528(2) | 37(1) |
| C(21)  | 5753(3) | 3897(2) | 7055(2) | 28(1) |
| C(31)  | 4683(3) | 4446(3) | 6543(2) | 29(1) |
| C(41)  | 3667(3) | 4891(3) | 6871(2) | 29(1) |
| C(51)  | 2632(3) | 5297(3) | 6178(2) | 40(1) |
| C(12)  | 7074(2) | 3065(3) | 8527(2) | 29(1) |
| C(22)  | 7373(3) | 1866(3) | 8981(2) | 33(1) |
| C(32)  | 8395(3) | 1185(3) | 9571(3) | 44(1) |
| C(42)  | 9112(3) | 1656(3) | 9703(3) | 46(1) |
| C(52)  | 8821(3) | 2825(3) | 9247(3) | 42(1) |
| C(62)  | 7803(3) | 3555(3) | 8657(2) | 33(1) |
| C(72)  | 6587(3) | 1316(3) | 8891(3) | 40(1) |
| C(82)  | 7140(4) | 298(3)  | 8604(3) | 55(1) |
| C(92)  | 6098(4) | 939(4)  | 9865(3) | 61(1) |
| C(102) | 7512(3) | 4833(3) | 8190(3) | 39(1) |
| C(112) | 8193(4) | 5165(4) | 7334(3) | 56(1) |
| C(122) | 7648(3) | 5280(3) | 8968(3) | 47(1) |
| C(13)  | 2516(2) | 5301(3) | 8075(2) | 28(1) |
| C(23)  | 2016(3) | 4494(3) | 8497(2) | 31(1) |
| C(33)  | 975(3)  | 4852(3) | 8791(2) | 35(1) |
| C(43)  | 438(3)  | 5972(3) | 8698(2) | 37(1) |
| C(53)  | 952(3)  | 6738(3) | 8318(2) | 34(1) |
| C(63)  | 1985(3) | 6430(3) | 7998(2) | 30(1) |
| C(73)  | 2625(3) | 3243(3) | 8695(3) | 37(1) |
| C(83)  | 1938(4) | 2712(4) | 8392(4) | 59(1) |
| C(93)  | 3095(4) | 2563(3) | 9804(3) | 59(1) |
| C(103) | 2522(3) | 7297(3) | 7592(2) | 34(1) |
| C(113) | 1868(3) | 8300(3) | 6605(3) | 47(1) |
| C(123) | 2688(3) | 7730(3) | 8362(3) | 46(1) |

|        |          |          |         |        |
|--------|----------|----------|---------|--------|
| K(1)   | 5000     | 10000    | 5000    | 30(1)  |
| O(10)  | 4619(2)  | 10914(2) | 6493(2) | 36(1)  |
| O(20)  | 4705(2)  | 8702(2)  | 6916(2) | 34(1)  |
| O(30)  | 5608(2)  | 7658(2)  | 5536(2) | 35(1)  |
| C(10)  | 3984(3)  | 12116(3) | 6117(3) | 43(1)  |
| C(20)  | 4253(3)  | 10273(3) | 7367(3) | 41(1)  |
| C(30)  | 4937(3)  | 9028(3)  | 7668(3) | 41(1)  |
| C(40)  | 5280(3)  | 7506(3)  | 7187(2) | 36(1)  |
| C(50)  | 5040(3)  | 7218(3)  | 6350(2) | 37(1)  |
| C(60)  | 5519(3)  | 7297(3)  | 4767(3) | 40(1)  |
| O(40)  | 2927(2)  | 10313(3) | 4554(2) | 58(1)  |
| C(70)  | 2079(3)  | 11315(4) | 4588(3) | 57(1)  |
| C(80)  | 1137(4)  | 11649(5) | 3842(4) | 82(2)  |
| C(90)  | 1674(4)  | 11113(5) | 3136(4) | 82(2)  |
| C(100) | 2563(3)  | 10021(4) | 3836(3) | 57(1)  |
| O(50)  | 11014(5) | 1912(5)  | 6641(4) | 126(2) |
| C(110) | 10786(5) | 1110(6)  | 7544(5) | 85(2)  |
| C(120) | 9789(5)  | 952(6)   | 7329(5) | 92(2)  |
| C(130) | 9488(5)  | 1610(7)  | 6202(5) | 104(2) |
| C(140) | 9963(7)  | 2527(7)  | 5980(6) | 121(3) |

---

**Table S-6.** Bond lengths [ $\text{\AA}$ ] and angles [ $^\circ$ ] for **2**.

---

|              |          |
|--------------|----------|
| Fe(1)-N(1)   | 1.744(3) |
| Fe(1)-N(11)  | 1.936(2) |
| Fe(1)-N(21)  | 1.940(3) |
| N(1)-N(1)#1  | 1.186(6) |
| N(11)-C(21)  | 1.350(4) |
| N(11)-C(12)  | 1.436(4) |
| N(21)-C(41)  | 1.343(4) |
| N(21)-C(13)  | 1.434(4) |
| C(11)-C(21)  | 1.509(4) |
| C(11)-H(11A) | 0.9800   |
| C(11)-H(11B) | 0.9800   |
| C(11)-H(11C) | 0.9800   |
| C(21)-C(31)  | 1.400(4) |
| C(31)-C(41)  | 1.409(4) |
| C(31)-H(31)  | 0.9500   |
| C(41)-C(51)  | 1.511(4) |
| C(51)-H(51A) | 0.9800   |
| C(51)-H(51B) | 0.9800   |
| C(51)-H(51C) | 0.9800   |
| C(12)-C(62)  | 1.409(5) |
| C(12)-C(22)  | 1.413(4) |
| C(22)-C(32)  | 1.397(5) |
| C(22)-C(72)  | 1.520(5) |
| C(32)-C(42)  | 1.377(6) |
| C(32)-H(32)  | 0.9500   |
| C(42)-C(52)  | 1.378(5) |
| C(42)-H(42)  | 0.9500   |
| C(52)-C(62)  | 1.400(5) |
| C(52)-H(52)  | 0.9500   |
| C(62)-C(102) | 1.512(5) |
| C(72)-C(92)  | 1.523(5) |
| C(72)-C(82)  | 1.537(5) |
| C(72)-H(72)  | 1.0000   |
| C(82)-H(82A) | 0.9800   |
| C(82)-H(82B) | 0.9800   |
| C(82)-H(82C) | 0.9800   |



|               |          |
|---------------|----------|
| C(92)-H(92A)  | 0.9800   |
| C(92)-H(92B)  | 0.9800   |
| C(92)-H(92C)  | 0.9800   |
| C(102)-C(122) | 1.532(5) |
| C(102)-C(112) | 1.535(5) |
| C(102)-H(102) | 1.0000   |
| C(112)-H(11D) | 0.9800   |
| C(112)-H(11E) | 0.9800   |
| C(112)-H(11F) | 0.9800   |
| C(122)-H(12A) | 0.9800   |
| C(122)-H(12B) | 0.9800   |
| C(122)-H(12C) | 0.9800   |
| C(13)-C(63)   | 1.410(4) |
| C(13)-C(23)   | 1.417(4) |
| C(23)-C(33)   | 1.393(4) |
| C(23)-C(73)   | 1.518(4) |
| C(33)-C(43)   | 1.392(5) |
| C(33)-H(33)   | 0.9500   |
| C(43)-C(53)   | 1.381(5) |
| C(43)-H(43)   | 0.9500   |
| C(53)-C(63)   | 1.394(4) |
| C(53)-H(53)   | 0.9500   |
| C(63)-C(103)  | 1.516(4) |
| C(73)-C(83)   | 1.517(5) |
| C(73)-C(93)   | 1.531(5) |
| C(73)-H(73)   | 1.0000   |
| C(83)-H(83A)  | 0.9800   |
| C(83)-H(83B)  | 0.9800   |
| C(83)-H(83C)  | 0.9800   |
| C(93)-H(93A)  | 0.9800   |
| C(93)-H(93B)  | 0.9800   |
| C(93)-H(93C)  | 0.9800   |
| C(103)-C(123) | 1.520(5) |
| C(103)-C(113) | 1.544(5) |
| C(103)-H(103) | 1.0000   |
| C(113)-H(11G) | 0.9800   |
| C(113)-H(11H) | 0.9800   |
| C(113)-H(11I) | 0.9800   |

|               |          |
|---------------|----------|
| C(123)-H(12D) | 0.9800   |
| C(123)-H(12E) | 0.9800   |
| C(123)-H(12F) | 0.9800   |
| K(1)-O(40)    | 2.660(3) |
| K(1)-O(40)#2  | 2.660(3) |
| K(1)-O(20)#2  | 2.777(2) |
| K(1)-O(20)    | 2.777(2) |
| K(1)-O(30)#2  | 2.793(2) |
| K(1)-O(30)    | 2.793(2) |
| K(1)-O(10)#2  | 2.870(2) |
| K(1)-O(10)    | 2.870(2) |
| K(1)-C(50)#2  | 3.528(3) |
| K(1)-C(50)    | 3.528(3) |
| O(10)-C(20)   | 1.425(4) |
| O(10)-C(10)   | 1.429(4) |
| O(20)-C(30)   | 1.419(4) |
| O(20)-C(40)   | 1.427(4) |
| O(30)-C(60)   | 1.418(4) |
| O(30)-C(50)   | 1.432(4) |
| C(10)-C(60)#2 | 1.505(5) |
| C(10)-H(10A)  | 0.9900   |
| C(10)-H(10B)  | 0.9900   |
| C(20)-C(30)   | 1.498(5) |
| C(20)-H(20A)  | 0.9900   |
| C(20)-H(20B)  | 0.9900   |
| C(30)-H(30A)  | 0.9900   |
| C(30)-H(30B)  | 0.9900   |
| C(40)-C(50)   | 1.501(5) |
| C(40)-H(40A)  | 0.9900   |
| C(40)-H(40B)  | 0.9900   |
| C(50)-H(50)   | 1.0000   |
| C(60)-C(10)#2 | 1.505(5) |
| C(60)-H(60A)  | 0.9900   |
| C(60)-H(60B)  | 0.9900   |
| O(40)-C(100)  | 1.413(5) |
| O(40)-C(70)   | 1.441(5) |
| C(70)-C(80)   | 1.488(6) |
| C(70)-H(70A)  | 0.9900   |

|                     |            |
|---------------------|------------|
| C(70)-H(70B)        | 0.9900     |
| C(80)-C(90)         | 1.512(7)   |
| C(80)-H(80A)        | 0.9900     |
| C(80)-H(80B)        | 0.9900     |
| C(90)-C(100)        | 1.504(6)   |
| C(90)-H(90A)        | 0.9900     |
| C(90)-H(90B)        | 0.9900     |
| C(100)-H(10C)       | 0.9900     |
| C(100)-H(10D)       | 0.9900     |
| O(50)-C(110)        | 1.458(8)   |
| O(50)-C(140)        | 1.467(9)   |
| C(110)-C(120)       | 1.465(8)   |
| C(110)-H(11J)       | 0.9900     |
| C(110)-H(11K)       | 0.9900     |
| C(120)-C(130)       | 1.519(9)   |
| C(120)-H(12G)       | 0.9900     |
| C(120)-H(12H)       | 0.9900     |
| C(130)-C(140)       | 1.523(11)  |
| C(130)-H(13A)       | 0.9900     |
| C(130)-H(13B)       | 0.9900     |
| C(140)-H(14A)       | 0.9900     |
| C(140)-H(14B)       | 0.9900     |
|                     |            |
| N(1)-Fe(1)-N(11)    | 131.70(12) |
| N(1)-Fe(1)-N(21)    | 128.43(12) |
| N(11)-Fe(1)-N(21)   | 98.58(10)  |
| N(1)#1-N(1)-Fe(1)   | 175.2(4)   |
| C(21)-N(11)-C(12)   | 120.1(2)   |
| C(21)-N(11)-Fe(1)   | 121.9(2)   |
| C(12)-N(11)-Fe(1)   | 117.86(19) |
| C(41)-N(21)-C(13)   | 118.8(2)   |
| C(41)-N(21)-Fe(1)   | 122.1(2)   |
| C(13)-N(21)-Fe(1)   | 119.01(19) |
| C(21)-C(11)-H(11A)  | 109.5      |
| C(21)-C(11)-H(11B)  | 109.5      |
| H(11A)-C(11)-H(11B) | 109.5      |
| C(21)-C(11)-H(11C)  | 109.5      |
| H(11A)-C(11)-H(11C) | 109.5      |

|                     |          |
|---------------------|----------|
| H(11B)-C(11)-H(11C) | 109.5    |
| N(11)-C(21)-C(31)   | 123.2(3) |
| N(11)-C(21)-C(11)   | 119.3(3) |
| C(31)-C(21)-C(11)   | 117.5(3) |
| C(21)-C(31)-C(41)   | 130.2(3) |
| C(21)-C(31)-H(31)   | 114.9    |
| C(41)-C(31)-H(31)   | 114.9    |
| N(21)-C(41)-C(31)   | 123.0(3) |
| N(21)-C(41)-C(51)   | 119.4(3) |
| C(31)-C(41)-C(51)   | 117.5(3) |
| C(41)-C(51)-H(51A)  | 109.5    |
| C(41)-C(51)-H(51B)  | 109.5    |
| H(51A)-C(51)-H(51B) | 109.5    |
| C(41)-C(51)-H(51C)  | 109.5    |
| H(51A)-C(51)-H(51C) | 109.5    |
| H(51B)-C(51)-H(51C) | 109.5    |
| C(62)-C(12)-C(22)   | 120.3(3) |
| C(62)-C(12)-N(11)   | 120.3(3) |
| C(22)-C(12)-N(11)   | 119.2(3) |
| C(32)-C(22)-C(12)   | 118.6(3) |
| C(32)-C(22)-C(72)   | 119.7(3) |
| C(12)-C(22)-C(72)   | 121.6(3) |
| C(42)-C(32)-C(22)   | 121.5(3) |
| C(42)-C(32)-H(32)   | 119.3    |
| C(22)-C(32)-H(32)   | 119.3    |
| C(32)-C(42)-C(52)   | 119.6(3) |
| C(32)-C(42)-H(42)   | 120.2    |
| C(52)-C(42)-H(42)   | 120.2    |
| C(42)-C(52)-C(62)   | 121.6(3) |
| C(42)-C(52)-H(52)   | 119.2    |
| C(62)-C(52)-H(52)   | 119.2    |
| C(52)-C(62)-C(12)   | 118.4(3) |
| C(52)-C(62)-C(102)  | 119.6(3) |
| C(12)-C(62)-C(102)  | 122.0(3) |
| C(22)-C(72)-C(92)   | 110.2(3) |
| C(22)-C(72)-C(82)   | 112.5(3) |
| C(92)-C(72)-C(82)   | 110.3(3) |
| C(22)-C(72)-H(72)   | 107.9    |

|                      |          |
|----------------------|----------|
| C(92)-C(72)-H(72)    | 107.9    |
| C(82)-C(72)-H(72)    | 107.9    |
| C(72)-C(82)-H(82A)   | 109.5    |
| C(72)-C(82)-H(82B)   | 109.5    |
| H(82A)-C(82)-H(82B)  | 109.5    |
| C(72)-C(82)-H(82C)   | 109.5    |
| H(82A)-C(82)-H(82C)  | 109.5    |
| H(82B)-C(82)-H(82C)  | 109.5    |
| C(72)-C(92)-H(92A)   | 109.5    |
| C(72)-C(92)-H(92B)   | 109.5    |
| H(92A)-C(92)-H(92B)  | 109.5    |
| C(72)-C(92)-H(92C)   | 109.5    |
| H(92A)-C(92)-H(92C)  | 109.5    |
| H(92B)-C(92)-H(92C)  | 109.5    |
| C(62)-C(102)-C(122)  | 111.8(3) |
| C(62)-C(102)-C(112)  | 111.0(3) |
| C(122)-C(102)-C(112) | 110.8(3) |
| C(62)-C(102)-H(102)  | 107.7    |
| C(122)-C(102)-H(102) | 107.7    |
| C(112)-C(102)-H(102) | 107.7    |
| C(102)-C(112)-H(11D) | 109.5    |
| C(102)-C(112)-H(11E) | 109.5    |
| H(11D)-C(112)-H(11E) | 109.5    |
| C(102)-C(112)-H(11F) | 109.5    |
| H(11D)-C(112)-H(11F) | 109.5    |
| H(11E)-C(112)-H(11F) | 109.5    |
| C(102)-C(122)-H(12A) | 109.5    |
| C(102)-C(122)-H(12B) | 109.5    |
| H(12A)-C(122)-H(12B) | 109.5    |
| C(102)-C(122)-H(12C) | 109.5    |
| H(12A)-C(122)-H(12C) | 109.5    |
| H(12B)-C(122)-H(12C) | 109.5    |
| C(63)-C(13)-C(23)    | 120.2(3) |
| C(63)-C(13)-N(21)    | 120.5(3) |
| C(23)-C(13)-N(21)    | 119.2(3) |
| C(33)-C(23)-C(13)    | 118.7(3) |
| C(33)-C(23)-C(73)    | 120.0(3) |
| C(13)-C(23)-C(73)    | 121.1(3) |

|                      |          |
|----------------------|----------|
| C(43)-C(33)-C(23)    | 121.3(3) |
| C(43)-C(33)-H(33)    | 119.4    |
| C(23)-C(33)-H(33)    | 119.4    |
| C(53)-C(43)-C(33)    | 119.4(3) |
| C(53)-C(43)-H(43)    | 120.3    |
| C(33)-C(43)-H(43)    | 120.3    |
| C(43)-C(53)-C(63)    | 121.8(3) |
| C(43)-C(53)-H(53)    | 119.1    |
| C(63)-C(53)-H(53)    | 119.1    |
| C(53)-C(63)-C(13)    | 118.6(3) |
| C(53)-C(63)-C(103)   | 120.0(3) |
| C(13)-C(63)-C(103)   | 121.4(3) |
| C(83)-C(73)-C(23)    | 114.3(3) |
| C(83)-C(73)-C(93)    | 110.4(3) |
| C(23)-C(73)-C(93)    | 109.1(3) |
| C(83)-C(73)-H(73)    | 107.6    |
| C(23)-C(73)-H(73)    | 107.6    |
| C(93)-C(73)-H(73)    | 107.6    |
| C(73)-C(83)-H(83A)   | 109.5    |
| C(73)-C(83)-H(83B)   | 109.5    |
| H(83A)-C(83)-H(83B)  | 109.5    |
| C(73)-C(83)-H(83C)   | 109.5    |
| H(83A)-C(83)-H(83C)  | 109.5    |
| H(83B)-C(83)-H(83C)  | 109.5    |
| C(73)-C(93)-H(93A)   | 109.5    |
| C(73)-C(93)-H(93B)   | 109.5    |
| H(93A)-C(93)-H(93B)  | 109.5    |
| C(73)-C(93)-H(93C)   | 109.5    |
| H(93A)-C(93)-H(93C)  | 109.5    |
| H(93B)-C(93)-H(93C)  | 109.5    |
| C(63)-C(103)-C(123)  | 111.6(3) |
| C(63)-C(103)-C(113)  | 111.6(3) |
| C(123)-C(103)-C(113) | 111.0(3) |
| C(63)-C(103)-H(103)  | 107.5    |
| C(123)-C(103)-H(103) | 107.5    |
| C(113)-C(103)-H(103) | 107.5    |
| C(103)-C(113)-H(11G) | 109.5    |
| C(103)-C(113)-H(11H) | 109.5    |

|                      |           |
|----------------------|-----------|
| H(11G)-C(113)-H(11H) | 109.5     |
| C(103)-C(113)-H(11I) | 109.5     |
| H(11G)-C(113)-H(11I) | 109.5     |
| H(11H)-C(113)-H(11I) | 109.5     |
| C(103)-C(123)-H(12D) | 109.5     |
| C(103)-C(123)-H(12E) | 109.5     |
| H(12D)-C(123)-H(12E) | 109.5     |
| C(103)-C(123)-H(12F) | 109.5     |
| H(12D)-C(123)-H(12F) | 109.5     |
| H(12E)-C(123)-H(12F) | 109.5     |
| O(40)-K(1)-O(40)#2   | 180.0     |
| O(40)-K(1)-O(20)#2   | 96.69(8)  |
| O(40)#2-K(1)-O(20)#2 | 83.31(8)  |
| O(40)-K(1)-O(20)     | 83.31(8)  |
| O(40)#2-K(1)-O(20)   | 96.69(8)  |
| O(20)#2-K(1)-O(20)   | 180.0     |
| O(40)-K(1)-O(30)#2   | 90.80(8)  |
| O(40)#2-K(1)-O(30)#2 | 89.20(8)  |
| O(20)#2-K(1)-O(30)#2 | 62.90(6)  |
| O(20)-K(1)-O(30)#2   | 117.10(6) |
| O(40)-K(1)-O(30)     | 89.19(8)  |
| O(40)#2-K(1)-O(30)   | 90.80(8)  |
| O(20)#2-K(1)-O(30)   | 117.10(6) |
| O(20)-K(1)-O(30)     | 62.90(6)  |
| O(30)#2-K(1)-O(30)   | 180.00(3) |
| O(40)-K(1)-O(10)#2   | 82.73(8)  |
| O(40)#2-K(1)-O(10)#2 | 97.27(8)  |
| O(20)#2-K(1)-O(10)#2 | 59.69(6)  |
| O(20)-K(1)-O(10)#2   | 120.31(6) |
| O(30)#2-K(1)-O(10)#2 | 120.83(6) |
| O(30)-K(1)-O(10)#2   | 59.18(6)  |
| O(40)-K(1)-O(10)     | 97.27(8)  |
| O(40)#2-K(1)-O(10)   | 82.73(8)  |
| O(20)#2-K(1)-O(10)   | 120.31(6) |
| O(20)-K(1)-O(10)     | 59.69(6)  |
| O(30)#2-K(1)-O(10)   | 59.17(6)  |
| O(30)-K(1)-O(10)     | 120.82(6) |
| O(10)#2-K(1)-O(10)   | 180.0     |

|                      |            |
|----------------------|------------|
| O(40)-K(1)-C(50)#2   | 101.37(9)  |
| O(40)#2-K(1)-C(50)#2 | 78.63(9)   |
| O(20)#2-K(1)-C(50)#2 | 42.40(7)   |
| O(20)-K(1)-C(50)#2   | 137.60(7)  |
| O(30)#2-K(1)-C(50)#2 | 22.57(7)   |
| O(30)-K(1)-C(50)#2   | 157.43(7)  |
| O(10)#2-K(1)-C(50)#2 | 102.05(7)  |
| O(10)-K(1)-C(50)#2   | 77.95(7)   |
| O(40)-K(1)-C(50)     | 78.63(9)   |
| O(40)#2-K(1)-C(50)   | 101.37(9)  |
| O(20)#2-K(1)-C(50)   | 137.60(7)  |
| O(20)-K(1)-C(50)     | 42.40(7)   |
| O(30)#2-K(1)-C(50)   | 157.43(7)  |
| O(30)-K(1)-C(50)     | 22.57(7)   |
| O(10)#2-K(1)-C(50)   | 77.95(7)   |
| O(10)-K(1)-C(50)     | 102.05(7)  |
| C(50)#2-K(1)-C(50)   | 180.0      |
| C(20)-O(10)-C(10)    | 112.7(2)   |
| C(20)-O(10)-K(1)     | 114.52(18) |
| C(10)-O(10)-K(1)     | 114.58(19) |
| C(30)-O(20)-C(40)    | 111.4(2)   |
| C(30)-O(20)-K(1)     | 114.76(18) |
| C(40)-O(20)-K(1)     | 111.74(18) |
| C(60)-O(30)-C(50)    | 111.4(2)   |
| C(60)-O(30)-K(1)     | 117.78(18) |
| C(50)-O(30)-K(1)     | 108.94(17) |
| O(10)-C(10)-C(60)#2  | 107.8(3)   |
| O(10)-C(10)-H(10A)   | 110.2      |
| C(60)#2-C(10)-H(10A) | 110.2      |
| O(10)-C(10)-H(10B)   | 110.2      |
| C(60)#2-C(10)-H(10B) | 110.2      |
| H(10A)-C(10)-H(10B)  | 108.5      |
| O(10)-C(20)-C(30)    | 108.2(3)   |
| O(10)-C(20)-H(20A)   | 110.1      |
| C(30)-C(20)-H(20A)   | 110.1      |
| O(10)-C(20)-H(20B)   | 110.1      |
| C(30)-C(20)-H(20B)   | 110.1      |
| H(20A)-C(20)-H(20B)  | 108.4      |



|                      |           |
|----------------------|-----------|
| O(20)-C(30)-C(20)    | 108.5(3)  |
| O(20)-C(30)-H(30A)   | 110.0     |
| C(20)-C(30)-H(30A)   | 110.0     |
| O(20)-C(30)-H(30B)   | 110.0     |
| C(20)-C(30)-H(30B)   | 110.0     |
| H(30A)-C(30)-H(30B)  | 108.4     |
| O(20)-C(40)-C(50)    | 109.1(3)  |
| O(20)-C(40)-H(40A)   | 109.9     |
| C(50)-C(40)-H(40A)   | 109.9     |
| O(20)-C(40)-H(40B)   | 109.9     |
| C(50)-C(40)-H(40B)   | 109.9     |
| H(40A)-C(40)-H(40B)  | 108.3     |
| O(30)-C(50)-C(40)    | 108.7(3)  |
| O(30)-C(50)-K(1)     | 48.49(13) |
| C(40)-C(50)-K(1)     | 79.02(17) |
| O(30)-C(50)-H(50)    | 124.5     |
| C(40)-C(50)-H(50)    | 124.5     |
| K(1)-C(50)-H(50)     | 124.5     |
| O(30)-C(60)-C(10)#2  | 109.4(3)  |
| O(30)-C(60)-H(60A)   | 109.8     |
| C(10)#2-C(60)-H(60A) | 109.8     |
| O(30)-C(60)-H(60B)   | 109.8     |
| C(10)#2-C(60)-H(60B) | 109.8     |
| H(60A)-C(60)-H(60B)  | 108.2     |
| C(100)-O(40)-C(70)   | 109.7(3)  |
| C(100)-O(40)-K(1)    | 125.1(2)  |
| C(70)-O(40)-K(1)     | 117.0(2)  |
| O(40)-C(70)-C(80)    | 106.5(4)  |
| O(40)-C(70)-H(70A)   | 110.4     |
| C(80)-C(70)-H(70A)   | 110.4     |
| O(40)-C(70)-H(70B)   | 110.4     |
| C(80)-C(70)-H(70B)   | 110.4     |
| H(70A)-C(70)-H(70B)  | 108.6     |
| C(70)-C(80)-C(90)    | 103.1(4)  |
| C(70)-C(80)-H(80A)   | 111.1     |
| C(90)-C(80)-H(80A)   | 111.1     |
| C(70)-C(80)-H(80B)   | 111.1     |
| C(90)-C(80)-H(80B)   | 111.1     |

|                      |          |
|----------------------|----------|
| H(80A)-C(80)-H(80B)  | 109.1    |
| C(100)-C(90)-C(80)   | 101.9(4) |
| C(100)-C(90)-H(90A)  | 111.4    |
| C(80)-C(90)-H(90A)   | 111.4    |
| C(100)-C(90)-H(90B)  | 111.4    |
| C(80)-C(90)-H(90B)   | 111.4    |
| H(90A)-C(90)-H(90B)  | 109.3    |
| O(40)-C(100)-C(90)   | 104.8(4) |
| O(40)-C(100)-H(10C)  | 110.8    |
| C(90)-C(100)-H(10C)  | 110.8    |
| O(40)-C(100)-H(10D)  | 110.8    |
| C(90)-C(100)-H(10D)  | 110.8    |
| H(10C)-C(100)-H(10D) | 108.9    |
| C(110)-O(50)-C(140)  | 104.2(5) |
| O(50)-C(110)-C(120)  | 110.2(5) |
| O(50)-C(110)-H(11J)  | 109.6    |
| C(120)-C(110)-H(11J) | 109.6    |
| O(50)-C(110)-H(11K)  | 109.6    |
| C(120)-C(110)-H(11K) | 109.6    |
| H(11J)-C(110)-H(11K) | 108.1    |
| C(110)-C(120)-C(130) | 104.1(6) |
| C(110)-C(120)-H(12G) | 110.9    |
| C(130)-C(120)-H(12G) | 110.9    |
| C(110)-C(120)-H(12H) | 110.9    |
| C(130)-C(120)-H(12H) | 110.9    |
| H(12G)-C(120)-H(12H) | 108.9    |
| C(120)-C(130)-C(140) | 102.3(6) |
| C(120)-C(130)-H(13A) | 111.3    |
| C(140)-C(130)-H(13A) | 111.3    |
| C(120)-C(130)-H(13B) | 111.3    |
| C(140)-C(130)-H(13B) | 111.3    |
| H(13A)-C(130)-H(13B) | 109.2    |
| O(50)-C(140)-C(130)  | 103.3(6) |
| O(50)-C(140)-H(14A)  | 111.1    |
| C(130)-C(140)-H(14A) | 111.1    |
| O(50)-C(140)-H(14B)  | 111.1    |
| C(130)-C(140)-H(14B) | 111.1    |
| H(14A)-C(140)-H(14B) | 109.1    |

**Table S-7.** Anisotropic displacement parameters ( $\text{\AA}^2 \times 10^3$ ) for **2**. The anisotropic displacement factor exponent takes the form:  $-2\pi^2[ h^2 a^{*2}U^{11} + \dots + 2 h k a^* b^* U^{12} ]$

|        | U <sup>11</sup> | U <sup>22</sup> | U <sup>33</sup> | U <sup>23</sup> | U <sup>13</sup> | U <sup>12</sup> |
|--------|-----------------|-----------------|-----------------|-----------------|-----------------|-----------------|
| Fe(1)  | 29(1)           | 30(1)           | 28(1)           | -14(1)          | 3(1)            | -8(1)           |
| N(1)   | 39(2)           | 56(2)           | 42(2)           | -32(1)          | 5(1)            | -15(1)          |
| N(11)  | 27(1)           | 24(1)           | 28(1)           | -10(1)          | 3(1)            | -8(1)           |
| N(21)  | 29(1)           | 26(1)           | 25(1)           | -10(1)          | 5(1)            | -11(1)          |
| C(11)  | 36(2)           | 42(2)           | 32(2)           | -18(2)          | 10(1)           | -13(2)          |
| C(21)  | 35(2)           | 24(1)           | 26(2)           | -11(1)          | 9(1)            | -14(1)          |
| C(31)  | 35(2)           | 31(2)           | 23(1)           | -11(1)          | 5(1)            | -14(1)          |
| C(41)  | 34(2)           | 27(2)           | 26(2)           | -8(1)           | 4(1)            | -13(1)          |
| C(51)  | 37(2)           | 51(2)           | 29(2)           | -15(2)          | 1(1)            | -14(2)          |
| C(12)  | 27(2)           | 29(2)           | 28(2)           | -14(1)          | 6(1)            | -6(1)           |
| C(22)  | 39(2)           | 28(2)           | 28(2)           | -12(1)          | 7(1)            | -6(1)           |
| C(32)  | 45(2)           | 30(2)           | 38(2)           | -13(2)          | 5(2)            | 3(2)            |
| C(42)  | 32(2)           | 43(2)           | 48(2)           | -21(2)          | -3(2)           | 7(2)            |
| C(52)  | 28(2)           | 45(2)           | 50(2)           | -23(2)          | 1(2)            | -4(2)           |
| C(62)  | 27(2)           | 32(2)           | 35(2)           | -15(1)          | 4(1)            | -6(1)           |
| C(72)  | 53(2)           | 29(2)           | 39(2)           | -13(1)          | 12(2)           | -16(2)          |
| C(82)  | 73(3)           | 44(2)           | 58(2)           | -29(2)          | 21(2)           | -26(2)          |
| C(92)  | 82(3)           | 58(3)           | 62(3)           | -33(2)          | 37(2)           | -39(2)          |
| C(102) | 34(2)           | 33(2)           | 47(2)           | -14(2)          | -1(2)           | -13(1)          |
| C(112) | 66(3)           | 52(2)           | 51(2)           | -16(2)          | 11(2)           | -28(2)          |
| C(122) | 49(2)           | 40(2)           | 54(2)           | -21(2)          | -2(2)           | -15(2)          |
| C(13)  | 26(2)           | 30(2)           | 24(1)           | -10(1)          | 1(1)            | -9(1)           |
| C(23)  | 32(2)           | 32(2)           | 29(2)           | -12(1)          | 4(1)            | -13(1)          |
| C(33)  | 33(2)           | 40(2)           | 31(2)           | -12(1)          | 7(1)            | -17(1)          |
| C(43)  | 26(2)           | 43(2)           | 36(2)           | -11(2)          | 4(1)            | -12(1)          |
| C(53)  | 29(2)           | 31(2)           | 35(2)           | -12(1)          | 4(1)            | -6(1)           |
| C(63)  | 30(2)           | 28(2)           | 27(2)           | -6(1)           | 2(1)            | -10(1)          |
| C(73)  | 38(2)           | 32(2)           | 43(2)           | -15(2)          | 12(2)           | -17(1)          |
| C(83)  | 56(2)           | 57(2)           | 83(3)           | -43(2)          | 12(2)           | -27(2)          |
| C(93)  | 76(3)           | 29(2)           | 52(2)           | -8(2)           | -4(2)           | -9(2)           |
| C(103) | 31(2)           | 26(2)           | 40(2)           | -10(1)          | 8(1)            | -9(1)           |
| C(113) | 46(2)           | 33(2)           | 48(2)           | -5(2)           | 7(2)            | -14(2)          |
| C(123) | 47(2)           | 41(2)           | 58(2)           | -24(2)          | 13(2)           | -22(2)          |

|        |        |        |        |        |        |        |
|--------|--------|--------|--------|--------|--------|--------|
| K(1)   | 36(1)  | 27(1)  | 29(1)  | -12(1) | 6(1)   | -12(1) |
| O(10)  | 43(1)  | 35(1)  | 36(1)  | -18(1) | 13(1)  | -16(1) |
| O(20)  | 44(1)  | 30(1)  | 28(1)  | -10(1) | 4(1)   | -15(1) |
| O(30)  | 41(1)  | 30(1)  | 37(1)  | -16(1) | 9(1)   | -16(1) |
| C(10)  | 51(2)  | 35(2)  | 46(2)  | -24(2) | 12(2)  | -13(2) |
| C(20)  | 53(2)  | 44(2)  | 33(2)  | -20(2) | 16(2)  | -22(2) |
| C(30)  | 53(2)  | 44(2)  | 31(2)  | -14(2) | 7(2)   | -24(2) |
| C(40)  | 40(2)  | 30(2)  | 33(2)  | -7(1)  | 3(1)   | -13(1) |
| C(50)  | 45(2)  | 32(2)  | 35(2)  | -10(1) | 8(1)   | -21(2) |
| C(60)  | 51(2)  | 31(2)  | 45(2)  | -21(2) | 9(2)   | -17(2) |
| O(40)  | 41(1)  | 75(2)  | 57(2)  | -31(2) | -2(1)  | -15(1) |
| C(70)  | 52(2)  | 70(3)  | 51(2)  | -28(2) | 4(2)   | -21(2) |
| C(80)  | 53(3)  | 111(4) | 78(3)  | -62(3) | -11(2) | 0(3)   |
| C(90)  | 64(3)  | 96(4)  | 68(3)  | -50(3) | -15(2) | 9(3)   |
| C(100) | 45(2)  | 68(3)  | 57(2)  | -29(2) | 1(2)   | -16(2) |
| O(50)  | 162(5) | 159(5) | 94(3)  | -62(3) | 39(3)  | -90(4) |
| C(110) | 78(4)  | 95(4)  | 84(4)  | -42(3) | 13(3)  | -31(3) |
| C(120) | 75(4)  | 122(5) | 102(5) | -72(4) | 30(3)  | -35(3) |
| C(130) | 65(3)  | 147(6) | 98(5)  | -76(5) | 13(3)  | -9(4)  |
| C(140) | 113(6) | 100(5) | 93(5)  | -27(4) | 16(4)  | 6(5)   |

---

**Table S-8.** Hydrogen coordinates ( $\times 10^4$ ) and isotropic displacement parameters ( $\text{\AA}^2 \times 10^{-3}$ ) for **2**.

|        | x    | y    | z     | U(eq) |
|--------|------|------|-------|-------|
| H(11A) | 7262 | 3667 | 6547  | 55    |
| H(11B) | 6387 | 3640 | 5831  | 55    |
| H(11C) | 6959 | 2560 | 6865  | 55    |
| H(31)  | 4634 | 4531 | 5868  | 35    |
| H(51A) | 2210 | 4819 | 6492  | 60    |
| H(51B) | 2829 | 5239 | 5545  | 60    |
| H(51C) | 2184 | 6095 | 6048  | 60    |
| H(32)  | 8599 | 379  | 9889  | 52    |
| H(42)  | 9804 | 1178 | 10105 | 56    |
| H(52)  | 9323 | 3144 | 9335  | 51    |
| H(72)  | 5970 | 1906 | 8351  | 48    |
| H(82A) | 7470 | 546  | 7987  | 82    |
| H(82B) | 6588 | 16   | 8497  | 82    |
| H(82C) | 7715 | -315 | 9145  | 82    |
| H(92A) | 6687 | 352  | 10405 | 92    |
| H(92B) | 5562 | 625  | 9786  | 92    |
| H(92C) | 5730 | 1599 | 10030 | 92    |
| H(102) | 6720 | 5211 | 7897  | 47    |
| H(11D) | 8976 | 4814 | 7601  | 84    |
| H(11E) | 7962 | 5999 | 7019  | 84    |
| H(11F) | 8078 | 4892 | 6835  | 84    |
| H(12A) | 7181 | 5090 | 9490  | 71    |
| H(12B) | 7429 | 6112 | 8642  | 71    |
| H(12C) | 8419 | 4923 | 9269  | 71    |
| H(33)  | 625  | 4323 | 9059  | 42    |
| H(43)  | -276 | 6207 | 8893  | 45    |
| H(53)  | 592  | 7495 | 8275  | 41    |
| H(73)  | 3261 | 3191 | 8298  | 44    |
| H(83A) | 1340 | 2696 | 8807  | 88    |
| H(83B) | 2403 | 1930 | 8487  | 88    |
| H(83C) | 1627 | 3168 | 7686  | 88    |
| H(93A) | 3569 | 2890 | 9980  | 88    |

|        |       |       |       |     |
|--------|-------|-------|-------|-----|
| H(93B) | 3527  | 1762  | 9928  | 88  |
| H(93C) | 2490  | 2600  | 10214 | 88  |
| H(103) | 3267  | 6898  | 7440  | 41  |
| H(11G) | 1813  | 8004  | 6107  | 70  |
| H(11H) | 2247  | 8832  | 6354  | 70  |
| H(11I) | 1127  | 8702  | 6726  | 70  |
| H(12D) | 1974  | 8084  | 8558  | 69  |
| H(12E) | 3023  | 8298  | 8072  | 69  |
| H(12F) | 3173  | 7088  | 8953  | 69  |
| H(10A) | 3999  | 12397 | 6642  | 51  |
| H(10B) | 3209  | 12277 | 5911  | 51  |
| H(20A) | 3466  | 10421 | 7226  | 49  |
| H(20B) | 4334  | 10500 | 7915  | 49  |
| H(30A) | 5729  | 8894  | 7743  | 49  |
| H(30B) | 4761  | 8567  | 8318  | 49  |
| H(40A) | 5041  | 7064  | 7807  | 44  |
| H(40B) | 6081  | 7302  | 7315  | 44  |
| H(50)  | 4422  | 6977  | 6292  | 44  |
| H(60A) | 4735  | 7490  | 4563  | 49  |
| H(60B) | 5910  | 6457  | 5017  | 49  |
| H(70A) | 2349  | 11943 | 4416  | 69  |
| H(70B) | 1852  | 11141 | 5266  | 69  |
| H(80A) | 779   | 12492 | 3487  | 98  |
| H(80B) | 583   | 11342 | 4166  | 98  |
| H(90A) | 1146  | 10957 | 2801  | 99  |
| H(90B) | 1988  | 11607 | 2622  | 99  |
| H(10C) | 2267  | 9417  | 4159  | 68  |
| H(10D) | 3173  | 9747  | 3473  | 68  |
| H(11J) | 10685 | 1407  | 8070  | 102 |
| H(11K) | 11417 | 365   | 7794  | 102 |
| H(12G) | 9191  | 1266  | 7684  | 110 |
| H(12H) | 9937  | 131   | 7530  | 110 |
| H(13A) | 8680  | 1955  | 6011  | 125 |
| H(13B) | 9829  | 1111  | 5848  | 125 |
| H(14A) | 10080 | 2835  | 5269  | 145 |
| H(14B) | 9473  | 3165  | 6140  | 145 |

## References for Supporting Information:

- (1) M. S. Dresselhaus and G. Dresselhaus, *Adv. Phys.*, 1981, **30**, 139.
- (2) J. M. Smith, A. R. Sadique, T. R. Cundari, K. R. Rodgers, G. Lukat-Rodgers, R. J. Lachicotte, C. J. Flaschenriem, J. Vela and P. L. Holland, *J. Am. Chem. Soc.*, 2006, **128**, 756.
- (3) J. M. Smith, R. J. Lachicotte, K. A. Pittard, T. R. Cundari, G. Lukat-Rodgers, K. R. Rodgers and P. L. Holland, *J. Am. Chem. Soc.*, 2001, **123**, 9222.
- (4) E. M. Schubert, *J. Chem. Educ.* 1992, **69**, 62.
- (5) K. S. Cole and R. H. Cole. *J. Chem. Phys.* 1941, **9**, 341.
- (6) N. F. Chilton, R. P. Anderson, L. D. Turner, A. Soncini and K. S. Murray, *J. Comput. Chem.* 2013, **34**, 1164.
- (7) W. H. Harman, T. D. Harris, D. E. Freedman, H. Fong, A. Chang, J. D. Rinehart, A. Ozarowski, M. T. Sougrati, F. Grandjean, G. J. Long, J. R. Long and C. J. Chang, *J. Am. Chem. Soc.* 2010, **132**, 18115.
- (8) R. Orbach, *Proc. Phys. Soc. A.* 1961, **264**, 458.
- (9) K. N. Shrivastava, *Phys. Stat. Sol. B* 1983, **117**, 437.
- (10) a) A. Lunghi, F. Totti, R. Sessoli and S. Sanvito. *Nat. Commun.* 2017, **8**, 14620; b) A. Lunghi, F. Totti, S. Sanvito and R. Sessoli. *Chem. Sci.* 2017, **8**, 6051; c) L. Escalera-Moreno, J. J. Baldoví, A. Gaita-Ariño and E. Coronado. *Chem. Sci.* 2018, **9**, 3265
- (11) S. Stoll, A. Schweiger, *J. Magn. Reson.* 2006, **178(1)**, 42-55.
- (12) G. M. Sheldrick, *Acta Cryst.*, 2008, **A64**, 112.
